# Supplementary material for: ‘A sword of Damocles’: patient and caregiver beliefs, attitudes and perspectives on presymptomatic testing for autosomal dominant polycystic kidney disease: a focus group study
Source: PubMed Central journal article supplement — BMJ Open. 2020 Oct 10;10(10):e038005. doi: 10.1136/bmjopen-2020-038005 (PMC7549480; doi:10.1136/bmjopen-2020-038005), 2020-10-10
Supplement: bmjopen-2020-038005.draft_revisions.pdf [file bmjopen-2020-038005.draft_revisions.pdf]

# BMJ Open

BMJ Open is committed to open peer review. As part of this commitment we make the peer review history of every article we publish publicly available.

When an article is published we post the peer reviewers' comments and the authors' responses online. We also post the versions of the paper that were used during peer review. These are the versions that the peer review comments apply to.

The versions of the paper that follow are the versions that were submitted during the peer review process. They are not the versions of record or the final published versions. They should not be cited or distributed as the published version of this manuscript.

BMJ Open is an open access journal and the full, final, typeset and author-corrected version of record of the manuscript is available on our site with no access controls, subscription charges or pay-per-view fees (<http://bmjopen.bmj.com>).

If you have any questions on BMJ Open's open peer review process please email [info.bmjopen@bmj.com](mailto:info.bmjopen@bmj.com)

# BMJ Open

## **“A sword of Damocles”: Patient and caregiver beliefs, attitudes and perspectives on testing for autosomal dominant polycystic kidney disease – a focus group study**

|                               |                                                                                                                                                                                                                                                                                                                                                                                                                                                                                                                                                                                                                                                                                                                                                                                                                                                                                                                                                                                                                                                                                                                                                                                                                                                                                                                                                                                                                                                                                                                                                                                                                                                                                                                                                                                                                                                                                                                                                                                                                                                                                                                                                                                                                                                                                                                          |
|-------------------------------|--------------------------------------------------------------------------------------------------------------------------------------------------------------------------------------------------------------------------------------------------------------------------------------------------------------------------------------------------------------------------------------------------------------------------------------------------------------------------------------------------------------------------------------------------------------------------------------------------------------------------------------------------------------------------------------------------------------------------------------------------------------------------------------------------------------------------------------------------------------------------------------------------------------------------------------------------------------------------------------------------------------------------------------------------------------------------------------------------------------------------------------------------------------------------------------------------------------------------------------------------------------------------------------------------------------------------------------------------------------------------------------------------------------------------------------------------------------------------------------------------------------------------------------------------------------------------------------------------------------------------------------------------------------------------------------------------------------------------------------------------------------------------------------------------------------------------------------------------------------------------------------------------------------------------------------------------------------------------------------------------------------------------------------------------------------------------------------------------------------------------------------------------------------------------------------------------------------------------------------------------------------------------------------------------------------------------|
| Journal:                      | <i>BMJ Open</i>                                                                                                                                                                                                                                                                                                                                                                                                                                                                                                                                                                                                                                                                                                                                                                                                                                                                                                                                                                                                                                                                                                                                                                                                                                                                                                                                                                                                                                                                                                                                                                                                                                                                                                                                                                                                                                                                                                                                                                                                                                                                                                                                                                                                                                                                                                          |
| Manuscript ID                 | bmjopen-2020-038005                                                                                                                                                                                                                                                                                                                                                                                                                                                                                                                                                                                                                                                                                                                                                                                                                                                                                                                                                                                                                                                                                                                                                                                                                                                                                                                                                                                                                                                                                                                                                                                                                                                                                                                                                                                                                                                                                                                                                                                                                                                                                                                                                                                                                                                                                                      |
| Article Type:                 | Original research                                                                                                                                                                                                                                                                                                                                                                                                                                                                                                                                                                                                                                                                                                                                                                                                                                                                                                                                                                                                                                                                                                                                                                                                                                                                                                                                                                                                                                                                                                                                                                                                                                                                                                                                                                                                                                                                                                                                                                                                                                                                                                                                                                                                                                                                                                        |
| Date Submitted by the Author: | 18-Mar-2020                                                                                                                                                                                                                                                                                                                                                                                                                                                                                                                                                                                                                                                                                                                                                                                                                                                                                                                                                                                                                                                                                                                                                                                                                                                                                                                                                                                                                                                                                                                                                                                                                                                                                                                                                                                                                                                                                                                                                                                                                                                                                                                                                                                                                                                                                                              |
| Complete List of Authors:     | <p>Logeman, Charlotte; The University of Sydney, School of Public Health; Westmead Hospital, Centre for Kidney Research</p> <p>Cho, Yeoungjee; University of Queensland at Princess Alexandra Hospital, Australasian Kidney Trials Network; Princess Alexandra Hospital, Department of Nephrology</p> <p>Sautenet, Benedicte; Centre Hospitalier Régional Universitaire de Tours, Department of Nephrology Hypertension</p> <p>Rangan, Gopala; The Westmead Institute for Medical Research, Centre for Transplant and Renal Research; Westmead Hospital, Department of Renal Medicine</p> <p>Gutman, Talia; The University of Sydney, Sydney School of Public Health; Westmead Hospital, Centre for Kidney Research</p> <p>Craig, Jonathan; Flinders University Faculty of Medicine Nursing and Health Sciences, College of Medicine and Public Health,</p> <p>Ong, Albert; University of Sheffield Medical School, Academic Nephrology Unit, The Henry Wellcome Laboratories for Medical Research</p> <p>Chapman, Arlene; University of Chicago, Department of Medicine</p> <p>Ahn, Curie; Seoul National University, internal medicine</p> <p>Coolican, Helen; Polycystic Kidney Disease Foundation of Australia, Polycystic Kidney Disease Foundation of Australia</p> <p>Tze-Wah Kao, Juliana; Fu Jen Catholic University Hospital, School of Medicine; National Taiwan University Hospital, Department of Internal Medicine</p> <p>Gansevoort, Ron T.; University Medical Center Gronigen, Faculty of Medical Sciences</p> <p>Perrone, R; Tufts University School of Medicine, Division of Nephrology</p> <p>Harris, Tess; PKD International, Head office; PKD International, London office</p> <p>Torres, Vincent; Mayo Clinic, Department of Nephrology and Hypertension</p> <p>Fowler, Kevin; The Voice of the Patient, Kidney Health Initiative</p> <p>Pei, York; University of Toronto, Division of Nephrology and Division of Genomic Medicine</p> <p>Kerr, Peter; Monash Medical Centre, Nephrology</p> <p>Ryan, Jessica; Monash Medical Centre Clayton, Nephrology</p> <p>Johnson, David; Princess Alexandra Hospital, Department of Renal Medicine; The University of Queensland, Australasian Kidney Trials Network</p> <p>Viecelli, Andrea; University of Queensland, School of Medicine; University</p> |

|           |                                                                                                                                                                                                                                                                                                                                                                                                                                                                                                                                                                                                                                                                                                                                                                                                                                                                                                                                                                                                                                                                                                                                                                                                                    |
|-----------|--------------------------------------------------------------------------------------------------------------------------------------------------------------------------------------------------------------------------------------------------------------------------------------------------------------------------------------------------------------------------------------------------------------------------------------------------------------------------------------------------------------------------------------------------------------------------------------------------------------------------------------------------------------------------------------------------------------------------------------------------------------------------------------------------------------------------------------------------------------------------------------------------------------------------------------------------------------------------------------------------------------------------------------------------------------------------------------------------------------------------------------------------------------------------------------------------------------------|
|           | <p>of Queensland at Princess Alexandra Hospital, Australasian Kidney Trials Network<br/> Geneste, Clair; Centre Hospitalier Régional Universitaire de Tours, Department of Nephrology and Clinical Immunology<br/> Kim, Hyunsuk; Seoul National University Hospital, Internal medicine<br/> Kim, Yaerim ; The University of Sheffield, Department of Infection Immunity &amp; Cardiovascular Disease<br/> Howell, Martin; The Children's Hospital at Westmead, Centre for Kidney Research; University of Sydney, School of Public Health<br/> Ju, Angela; The University of Sydney, School of Public Health; Westmead Hospital, Centre for Kidney Research<br/> Manera , Karine; The University of Sydney, School of Public Health; Westmead Hospital, Centre for Kidney Research<br/> Teixeira-Pinto, Armando; The University of Sydney, School of Public Health; Westmead Hospital, Centre for Kidney Research<br/> Parasivam, Gayathri ; The University of Sydney Sydney Medical School, Discipline of Genetic Medicine; The Sydney Children's Hospitals Network Randwick and Westmead<br/> Tong, Allison; The University of Sydney, School of Public Health; Westmead Hospital, Centre for Kidney Research</p> |
| Keywords: | <p>GENETICS, Nephrology &lt; INTERNAL MEDICINE, MEDICAL EDUCATION &amp; TRAINING, MENTAL HEALTH, NEPHROLOGY, Paediatric nephrology &lt; NEPHROLOGY</p>                                                                                                                                                                                                                                                                                                                                                                                                                                                                                                                                                                                                                                                                                                                                                                                                                                                                                                                                                                                                                                                             |
|           |                                                                                                                                                                                                                                                                                                                                                                                                                                                                                                                                                                                                                                                                                                                                                                                                                                                                                                                                                                                                                                                                                                                                                                                                                    |

SCHOLARONE™  
Manuscripts

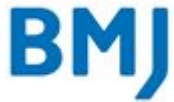

I, the Submitting Author has the right to grant and does grant on behalf of all authors of the Work (as defined in the below author licence), an exclusive licence and/or a non-exclusive licence for contributions from authors who are: i) UK Crown employees; ii) where BMJ has agreed a CC-BY licence shall apply, and/or iii) in accordance with the terms applicable for US Federal Government officers or employees acting as part of their official duties; on a worldwide, perpetual, irrevocable, royalty-free basis to BMJ Publishing Group Ltd ("BMJ") its licensees and where the relevant Journal is co-owned by BMJ to the co-owners of the Journal, to publish the Work in this journal and any other BMJ products and to exploit all rights, as set out in our [licence](#).

The Submitting Author accepts and understands that any supply made under these terms is made by BMJ to the Submitting Author unless you are acting as an employee on behalf of your employer or a postgraduate student of an affiliated institution which is paying any applicable article publishing charge ("APC") for Open Access articles. Where the Submitting Author wishes to make the Work available on an Open Access basis (and intends to pay the relevant APC), the terms of reuse of such Open Access shall be governed by a Creative Commons licence – details of these licences and which [Creative Commons](#) licence will apply to this Work are set out in our licence referred to above.

Other than as permitted in any relevant BMJ Author's Self Archiving Policies, I confirm this Work has not been accepted for publication elsewhere, is not being considered for publication elsewhere and does not duplicate material already published. I confirm all authors consent to publication of this Work and authorise the granting of this licence.

1           **“A sword of Damocles”**: Patient and caregiver beliefs, attitudes and perspectives on testing  
2  
3                           **for autosomal dominant polycystic kidney disease – a focus group study**  
4

5 **Author names**

6  
7 Charlotte Logeman<sup>1,2</sup>, Yeoungjee Cho<sup>3,4,5</sup>, Benedicte Sautenet<sup>6</sup>, Gopala Rangan<sup>7,8</sup>, Talia Gutman<sup>1,2</sup>,  
8  
9 Jonathan C Craig<sup>9</sup>, Albert CM Ong<sup>10</sup>, Arlene Chapman<sup>11</sup>, Curie Ahn<sup>12</sup>, Helen  
10  
11 Coolican<sup>13</sup>, Juliana Tze-Wah Kao<sup>14,15</sup>, Ron Gansevoort<sup>16</sup>, Ronald Perrone<sup>17</sup>, Tess Harris<sup>18</sup>, Vicente Torres<sup>19</sup>,  
12  
13 Kevin Fowler<sup>20</sup>, York Pei<sup>21</sup>, Peter G Kerr<sup>22</sup>, Jessica Ryan<sup>22</sup>, David W Johnson<sup>3,4,5</sup>, Andrea K  
14  
15 Vieceili<sup>3,4</sup>, Clair Geneste<sup>23</sup>, Hyunsuk Kim<sup>12</sup>, Yaerim Kim<sup>10</sup>, Martin Howell<sup>1,2</sup>, Angela Ju<sup>1,2</sup>, Karine E  
16  
17 Manera<sup>1,2</sup>, Armando Teixeira-Pinto<sup>1,2</sup>, Gayathri Parasivam<sup>24,25</sup>, Allison Tong<sup>1,2</sup>  
18  
19  
20  
21  
22

23 **Affiliations of each author**

24  
25  
26 <sup>1</sup>Sydney School of Public Health, The University of Sydney, Sydney NSW, Australia;

27  
28 <sup>2</sup>Centre for Kidney Research, The Children’s Hospital at Westmead, Sydney NSW, Australia;

29  
30 <sup>3</sup>Department of Nephrology, Princess Alexandra Hospital, Brisbane, Australia;

31  
32 <sup>4</sup>Australasian Kidney Trials Network, University of Queensland, Brisbane, Australia;

33  
34 <sup>5</sup>Translational Research Institute, Brisbane, Australia;

35  
36  
37 <sup>6</sup>Department of Nephrology Hypertension, Tours Hospital, SPHERE - INSERMU1246, University of Tours  
38  
39 and Nantes, Tours, France;

40  
41  
42 <sup>7</sup>Centre for Transplant and Renal Research, Westmead Institute for Medical Research, The University of  
43  
44 Sydney, Australia;

45  
46  
47 <sup>8</sup>Department of Renal Medicine, Westmead Hospital, Western Sydney Local Health District, Sydney,  
48  
49 Australia;

50  
51 <sup>9</sup>College of Medicine and Public Health, Flinders University;

52  
53  
54 <sup>10</sup>Academic Nephrology Unit, Department of Infection Immunity & Cardiovascular Disease, University of  
55  
56 Sheffield, United Kingdom;

57  
58 <sup>11</sup>Department of Medicine, The University of Chicago, United States;

59  
60 <sup>12</sup>Division of Nephrology, Seoul National University Hospital, South Korea;

1 <sup>13</sup>Polycystic Kidney Disease Foundation of Australia, Australia;

2 <sup>14</sup>School of Medicine, Fu Jen Catholic University and Fu Jen Catholic University Hospital, Taiwan;

3 <sup>15</sup>Department of Internal Medicine, National Taiwan University Hospital, Taiwan;

4 <sup>16</sup>Faculty of Medical Sciences, University Medical Center Gronigen, Netherlands;

5 <sup>17</sup>Division of Nephrology, Tufts Medical Center, Tufts University School of Medicine, United States;

6 <sup>18</sup>Polycystic Kidney Disease International, United Kingdom;

7 <sup>19</sup>Department of Nephrology and Hypertension, Mayo Clinic, United States;

8 <sup>20</sup>Kidney Health Initiative, Patient Family Partnership Council; President, The Voice of the Patient, United States

9 <sup>21</sup>Division of Nephrology and Division of Genomic Medicine, University of Toronto, Canada;

10 <sup>22</sup>Department of Nephrology, Monash Medical Centre and Monash University, Melbourne, Australia;

11 <sup>23</sup>Department of Nephrology and Clinical Immunology, Tours Hospital, University Francois Rabelais;

12 <sup>24</sup>Sydney Children's Hospitals Network, Westmead & Randwick

13 <sup>25</sup>Discipline of Genetic Medicine, Sydney Medical School, University of Sydney

14 **Address for correspondence:**

15 Charlotte Logeman

16 Centre for Kidney Research. The Children's Hospital at Westmead, Westmead, NSW 2145

17 Sydney, Australia

18 Email: [charlotte.logeman@sydney.edu.au](mailto:charlotte.logeman@sydney.edu.au)

19 **Abstract Word Count: 250**

20 **Text Word Count: 3,264**

## Abstract

**Background and objectives:** Presymptomatic testing are available for early diagnosis of hereditary autosomal dominant polycystic kidney disease (ADPKD). However, the complex ethical and psychosocial implications can make decision-making challenging and require an understanding of patients' values, goals and priorities. This study aims to describe patient and caregiver beliefs and expectations regarding testing for ADPKD.

**Design, setting, and participants:** 154 participants (120 patients and 34 caregivers) aged 18 years and over from eight centers in Australia, France and Korea participated in 17 focus groups. Transcripts were analyzed thematically.

**Results:** We identified five themes: *avoiding financial disadvantage* (insecurity in the inability to obtain life insurance, limited work opportunities, financial burden); *futility in uncertainty* (erratic and diverse manifestations of disease limiting utility, taking preventative actions in vain, daunted by perplexity of results, unaware of risk of inheriting ADPKD); *lacking autonomy and support in decisions* (overwhelmed by ambiguous information, medicalizing family planning, family pressures); *seizing control of wellbeing* (gaining confidence in early detection, allowing preparation for the future, reassurance in family resilience); and *anticipating impact on quality of life* (reassured by lack of symptoms, judging value of life with ADPKD).

**Conclusions:** For patients with ADPKD, testing provides an opportunity to take ownership of their health through family planning and preventive measures. However, these decisions can be wrought with tensions and uncertainty about prognostic implications, and the psychosocial and financial consequences of testing. Person-centered genetic counseling and education that addresses patients' concerns may support informed decision-making about testing in ADPKD.

## Strengths and Limitations of this study

- The focus groups allowed in-depth exploration of patients views on presymptomatic testing for autosomal dominant polycystic kidney disease and helped to understand their decision-making process.
- The number of participants and the diversity was a strength in this study, including 154 participants across Australia, France and Korea from both stakeholder groups relevant to this study (caregivers and patients).
- Research limitations are common to qualitative research methodology in that the data are not generalizable and is restricted to the expressed thoughts of participants.
- We acknowledge sensitive topics may be discussed at the focus groups and some views may have been suppressed in the focus group setting.



## Introduction

Autosomal dominant polycystic kidney disease (ADPKD) is the most common inherited kidney disease and affects about 10% of patients receiving kidney replacement therapy (1). Early phase of ADPKD is often asymptomatic but the development of kidney cysts leads to increased kidney volume, reduced kidney function and eventually follows a relentless course towards end-stage kidney disease (ESKD)(2-8). Clinical management involves pharmacological and lifestyle interventions to control hypertension, slow the progression of cysts, manage complications (extra-renal manifestations), and maintain quality of life (QoL) (9-11).

Diagnosis of ADPKD is usually based on family history, ultrasonography, computed tomography (CT) or magnetic resonance imaging (MRI) (12). Testing, however, can facilitate the diagnosis of ADPKD in patients whose renal phenotypes are atypical or asymptomatic, and in patients with unknown family history. It may also help identify living donors for kidney transplantation (13-15). However, testing is not part of routine care and remains controversial. In the United States, the United Kingdom and Australia, offering testing may be recommended when a diagnosis is needed to be confirmed in young patients with unknown family history, for family planning, to determine eligibility for kidney donation, or when the disease presents in childhood or adolescence (16). In some countries in Europe and Asia, access to asymptomatic or predictive testing is very restricted or not available (17).

For the scope of this paper, testing may include any strategy used to identify the presence of ADPKD prior to symptom onset (including genetic tests, blood tests, imaging such as ultrasound, CT, MRI, etc.) (13).

While testing for ADPKD has the potential to support early intervention, patients can suffer from anxiety and depression from being diagnosed prior to the onset of symptoms (18-21). There are also concerns about potential discrimination with employment and obtaining life insurance, and strains on social and familial relationships (16). The genetic aspect of family planning is emotionally challenging as patients contend with guilt and uncertainty in pursuing parenthood (22). Decision-making about testing is ethically challenging

1 with psychosocial implications, and requires an understanding of the patients' attitudes, priorities, and  
2 perspectives of testing. The aim of this study was to describe patient and caregiver perspectives on the value  
3 and risks of testing to support the development of strategies and interventions for testing for ADPKD that  
4 address their values and needs.  
5  
6  
7  
8  
9

## 11 **Methods**

13  
14  
15  
16 This focus group study was conducted as part of the Standardized Outcomes in Nephrology – Polycystic  
17 Kidney Disease (SONG-PKD) Initiative (23). This study is focused on perspectives of patients on testing for  
18 themselves and/or their children. We used the consolidated criteria for reporting qualitative studies  
19 (COREQ) to report the study (24).  
20  
21  
22  
23  
24  
25  
26  
27

### 28 *Participant recruitment and selection*

29  
30  
31  
32 Participants were recruited across eight centers in Australia (n=3), France (n=4) and Korea (n=1).  
33  
34 Participants were eligible if they spoke English (Australia), French (France) or Korean (Korea), were over  
35 18 years old and diagnosed with ADPKD, or a caregiver (i.e. family member or support person). We  
36  
37 purposively sampled participants to capture a diverse range of demographics (age, gender, employment  
38 status) and clinical characteristics (stage of CKD, age of diagnosis, current treatment, comorbidities and  
39 complications). Participants were given information packages to be able to provide informed consent and  
40 received reimbursement (\$USD25 – equivalent in local currency) for travel expenses. The Human Research  
41  
42 Ethics Committees of the Western Sydney Local Health District (HREC2009/6/4,14), Monash Medical  
43  
44 Centre (2010.031), Metro South Health District (17/QPAH/112), France (INSERM/2017) and Republic of  
45  
46 Korea (1709-097-886) approved this study.  
47  
48  
49  
50  
51  
52  
53  
54  
55  
56  
57

### 58 *Patient and public involvement*

1 The Standardized Outcomes in Nephrology – Polycystic Kidney Disease (SONG-PKD) Initiative (23) was  
2 developed to ensure outcomes in trials are relevant to patients and other stakeholders. The SONG-PKD  
3 Steering Group comprises of a multidisciplinary team of healthcare professionals and patients with PKD and  
4 was aimed to ultimately develop a core set of outcome domains informed by all stakeholders (including  
5 patients) to be reported in all trials in patients with ADPKD (23). Patients on the Steering Group were  
6 involved in the initial planning and design of the study. Purposively sampling was done across different  
7 centers and patients were able to invite any other patients that would be interested to participate. All  
8 participants were invited to be involved in the following step of SONG-PKD which involved completing a  
9 Delphi survey (23). Results of this survey will be emailed to all participants.  
10  
11  
12  
13  
14  
15  
16  
17  
18  
19  
20  
21  
22

### 23 *Data collection*

24  
25  
26  
27  
28 The two-hour focus group discussions were conducted from June to November of 2017 until data saturation.  
29 We developed the question guide from the literature and with input from the research team (22, 25, 26).  
30 Focus groups were convened in a venue external to the hospital and facilitated by one investigator (English  
31 – A.T. (researcher), T.G. (researcher), Y.C (academic nephrologist); French – B.S (academic nephrologist);  
32 Korean – Y.K.(academic nephrologist)). A co-facilitator recorded field notes. All discussions were audio-  
33 recorded and were transcribed.  
34  
35  
36  
37  
38  
39  
40  
41  
42  
43

### 44 *Data analysis*

45  
46  
47  
48 All transcripts were entered into HyperRESEARCH (Version 3.7) for analysis and coded line-by-line, in the  
49 original language and then translated for investigator triangulation, by C.L.(researcher) (English, French)  
50 and H.K. (academic nephrologist) (Korean) using thematic analysis and drawing on principles from  
51 grounded theory to identify concepts related to perspectives on testing for ADPKD (27). Codes were  
52 grouped by similar concepts into themes and subthemes which were discussed and revised with  
53 A.T./T.G./Y.C./B.S./Y.K. who independently read the translated transcripts. To ensure reliable interpretation  
54  
55  
56  
57  
58  
59  
60

of the translated transcripts, C.L and H.K. were available to give more context of the quotes. Investigator triangulation ensured that the analysis captured the full range and breadth of the data (28).

## Results

In total, 154 participants (120 patients, 34 caregivers) participated in 17 focus groups across Australia, France and Korea. The demographics are shown in Table 1. Participants' age ranged from 19 to 78 years (mean age 54.5 years) and 67 (42%) were men. Most patients were diagnosed between the ages of 21 to 40 years and the majority of patients were pre-dialysis (n=76, 61%), followed by transplant recipients (n=31, 26%) and those on dialysis (n=19, 13%). Reasons for declining to participate included having other commitments and being too unwell to participate.

Five themes were identified with both patients and caregivers contributing to the concept unless otherwise stated: avoiding financial disadvantage, futility in uncertainty, lacking autonomy and support in making decisions, seizing control of wellbeing, and anticipating impact on quality of life. Subthemes are described in the following section. Illustrative quotations for each theme are provided in Table 2. The conceptual links among themes are depicted in Figure 1.

### Avoiding financial disadvantage

*Insecurity in the inability to obtain life insurance:* Some participants (specifically caregivers) were concerned about patients being labeled as “high risk” when assessed for life insurance and expected they would pay higher premiums, be unable obtain insurance, or be “dropped” by their insurance provider. They suspected they would be unfairly penalized for a disease that may not manifest. For this reason, some did not disclose ADPKD or avoided confirmatory tests – “*Don't get it confirmed, just live your life as long as you can without being diagnosed.*” (caregiver, France). Parents worried that limited insurance would restrict their children from travelling and from attending school camps.

1  
2  
3 Limiting work opportunities: Some patients feared discrimination from employers who could deny or  
4 dismiss them because of a diagnosis. Some worried that the disease would impair their physical ability to  
5 perform at work. Parents considered how the risks of early diagnosis through testing may jeopardize work  
6 opportunities for their children - “[my] doctor advised me to organize a genetic test for [my son] ... but then  
7 I think if his test result comes back positive ... this may have a negative impact on his ability to work in  
8 future” (Australia). Some refused tests and avoided disclosing their medical history to protect employment  
9 prospects.  
10  
11  
12  
13  
14  
15  
16  
17  
18  
19  
20

21 Financial Burden: Some pre-symptomatic participants wanted to undergo testing for ADPKD, but the cost  
22 was prohibitive, particularly for participants in Korea, – “Genetic testing raises concerns about associated  
23 cost.... spending a lot of money in advance is a burden” (Korea). Some believed that a history of ADPKD  
24 warranted reimbursement from the government to improve equity of access to testing.  
25  
26  
27  
28  
29  
30  
31

### 32 **Futility in uncertainty**

33  
34  
35  
36

37 Erratic and diverse manifestations of disease limiting utility: The symptoms of ADPKD were regarded as  
38 unpredictable, such that a diagnosis would not provide useful information about symptom burden and  
39 prognosis. Patients and caregivers believed it was unnecessary to be concerned until symptoms become  
40 apparent – “[confirmatory testing] was a big call to make for something that could never ever actually  
41 develop.” (Australia).  
42  
43  
44  
45  
46  
47  
48  
49  
50

51 Taking preventative actions in vain: Participants who had been diagnosed through screening felt frustrated  
52 when attempts to minimize disease progression (e.g. with antihypertensive medications or smoking  
53 cessation) proved futile. Some felt helpless and perceived that testing prior to experiencing symptoms was  
54 useless since they were powerless to change the unpredictable course – “There’s no benefit to knowing  
55 early. There is nothing they can do to change the outcome, it’s going to happen in its own time” (Australia).  
56  
57  
58  
59  
60

1  
2  
3 Daunted by perplexity of results: Some parents worried that their child would be overwhelmed in trying to  
4 comprehend or interpret the results from testing and that it would create “*a sword of Damocles over [their]*  
5 *head causing worry, anxiety, depression and even posttraumatic stress disorder*” (France).  
6  
7  
8  
9

10  
11  
12 Unaware of risk of inheriting PKD: The threat of transmitting the disease to their children caused decisional  
13 conflict about testing. Some felt they would be more empowered by knowing the results – “*Knowing that*  
14 *you've got a possibility of a child having a disease is good, it can help you with other decisions*” (Australia).  
15  
16 Others struggled with the uncertainty of the impact of tests on decisions about family planning – “*probably*  
17 *the biggest impact in my life at the moment is whether or not I want to consider passing on the PKD gene.*”  
18 (Australia). For parents who were diagnosed after having children, they believed that the diagnosis would  
19 not have impacted their decisions – “*Genetically if there was some way of knowing that I was going to pass*  
20 *it on would I take that, or would I just go ahead and have the child? [...] I would have the child.*”  
21 (Australia).  
22  
23  
24  
25  
26  
27  
28  
29  
30  
31  
32  
33  
34

### 35 **Lacking support and autonomy in decisions**

36  
37  
38  
39 Overwhelmed by ambiguous information: Participants felt “*completely in the dark*” about testing. They  
40 struggled with conflicting opinions, such as what age to get screened, and some felt misled by clinicians – “*I*  
41 *remember the specialist [saying to mum], ‘girls don't get polycystic kidney disease so you're fine having two*  
42 *girls,’ so my sister and I lived in oblivion until I was 42*”. (Australia). Some thought that clinicians did not  
43 provide adequate genetic counseling. In Australia, some were unaware that a genetic test was available and  
44 felt they should be informed. They searched for information on the internet and asked other family members  
45 with ADPKD but were disappointed by a general lack of information.  
46  
47  
48  
49  
50  
51  
52  
53  
54  
55  
56

57  
58 Medicalizing family planning: Some participants regretted having tests when they were advised against  
59 having children - “[The doctors said] ‘*don't reproduce, that will stop the disease*’” (Australia). Some  
60

1 diagnosed through screening feared judgment from clinicians and felt pressured against having children.

2 Others appreciated the direct advice in family planning to support their decision – “[The doctors] *told me*  
3 *‘don’t do it’*. And I made the choice – no kids.” (France). Some resisted prenatal testing to avoid having to  
4  
5 confront decisions about termination of pregnancy – “*if genetic tests find PKD, are you going to abort the*  
6  
7 *fetus? No. If I found out early with fetus in utero, I will feel guilty and have bad feelings*” (Korea). Some  
8  
9 participants in France thought prenatal testing was useless because abortion was illegal – “*When he was in*  
10  
11 *utero, I wanted to abort. At the time, it was not possible.*” (France).  
12  
13  
14  
15  
16  
17

18 Family pressures: Some thought they should convince their family to get tested – “*From the moment I*  
19 *found that I had it, I wrote to all my relatives, and said, “Get screened”*” (Australia). Some parents expected  
20  
21 that testing would motivate behavior change to maintain health, and were frustrated when their child did not  
22  
23 demonstrate effort to protect their kidney health - “*I keep nagging him to see a doctor, see a specialist, and*  
24  
25 *he goes yeah, doctor said my kidneys are alright.*” (Australia). For some, tests on children were a collective  
26  
27 “*family concern*” and decision.  
28  
29  
30  
31  
32  
33  
34

### 35 **Seizing control of wellbeing**

36  
37  
38  
39 Gaining confidence from early detection: An early diagnosis through testing was thought to provide an  
40  
41 opportunity for participants to take control of their health by modifying their diet and taking preventive  
42  
43 medications, such as antihypertensive agents. Participants were empowered to monitor their health vigilantly  
44  
45 and gained confidence in their ability to preserve their QoL – “*Going to the doctor regularly, just getting*  
46  
47 *your blood pressure checked, because they say that if you can keep your blood pressure under control, they*  
48  
49 *[kidneys] might not fail.*” (Australia). For parents with a child with ADPKD, an early diagnosis motivated  
50  
51 them to educate and “*reinforce the importance of dietary health*” (Korea) in their children.  
52  
53  
54  
55  
56  
57

58 Allowing preparation for the future: An earlier diagnosis through testing enabled patients to mentally  
59  
60 prepare for potential symptom burden and make lifestyle changes (including financial and career planning)

1 to protect their QoL and avoid stress - "*Forewarned is forearmed*" (Australia). Some participants  
2 (particularly on dialysis) regretted not getting tested as they would have maximized their time whilst  
3 asymptomatic - "*If we had been educated earlier, we would not have worked so hard, we would have had a*  
4 *holiday, all those things would have been done so we had no regrets later*" (Australia).  
5  
6  
7  
8  
9

10  
11  
12 Reassurance from family resilience: Some observed their parents' optimism and resilience whilst on dialysis  
13 or with a transplant, and this strengthened confidence in their decision to be tested. Some appreciated that  
14 testing was more accessible for their children - "*now any of my family can go and get it done*" (Australia).  
15  
16  
17  
18  
19

### 20 **Anticipating impact on quality of life**

21  
22  
23  
24  
25 Reassured by lack of symptoms: Some participants were not interested in testing because their QoL had not  
26 been affected. They questioned "*well do I actually have it*" and did not worry about their disease or testing -  
27 "*I have not had any major problems related to the disease*" (France). Some parents were not concerned with  
28 testing or genetic transmission as they believed their child would not suffer a disadvantaged life because  
29 they had not.  
30  
31  
32  
33  
34  
35  
36  
37  
38

39 Judging the value of life with ADPKD: Some parents believed they would have decided against having  
40 children if they had been tested because ADPKD had caused their family to suffer - "*If I knew [that I had*  
41 *PKD], you would not be here.*" (France). Some participants respected their parents' decisions to have  
42 children but questioned that if they had had been tested "*would I exist today*"? Some did not see the merit in  
43 testing as they valued their lives regardless of ADPKD - "*You've got to be pretty careful in that area*  
44 *because you create beings that are adding quite a bit of value to society.*" (Australia).  
45  
46  
47  
48  
49  
50  
51  
52  
53  
54

### 55 **Discussion**



1 For some patients with ADPKD and caregivers, g testing provided an opportunity to gain certainty about  
2 their health status, foster motivation and confidence for self-management, prepare mentally and financially  
3 for the onset of symptomatic disease and seek support from family. However, others perceived testing as  
4 futile because they perceived preventative measures had little impact, and the onset and course of ADPKD  
5 were unpredictable. They were also concerned about interpreting the results and the implications for their  
6 current and future life, which could cause unnecessary worry and anxiety, particularly with regards to family  
7 planning. The costs incurred in accessing testing and the potential financial discrimination they expected to  
8 endure would impose substantial constraints on their lives and futures.

9  
10  
11  
12  
13  
14  
15  
16  
17  
18  
19  
20  
21 Overall, the perspectives of patients and caregivers were similar as they felt inadequately equipped and  
22 conflicted in making decisions, which was exacerbated by a lack of support and information and perceived  
23 pressure from family and healthcare professionals. They were also uncertain about the severity of the  
24 symptom burden, and it was difficult to judge the value of life with ADPKD. Patients who witnessed intense  
25 suffering in their family members with ADPKD were inclined to refuse testing to avoid becoming anxious  
26 about their future and did not expect that the diagnosis would increase their sense of control.

27  
28  
29  
30  
31  
32  
33  
34  
35  
36  
37 The variability in policies across the countries and parent-child roles may also explain some differences in  
38 perspectives. The cost of testing was of particular concern to patients in Korea, which may reflect the fact  
39 that testing is not funded by the government (29). A recent study showed that more than 70% of Korean  
40 patients believed that genetic testing should be included in Korea's national health testing program so these  
41 services can be provided at little expense (30). In Australia, access to dialysis and transplantation is provided  
42 to all citizens via government funded Medicare system(31). Transplantation is primarily limited due to  
43 insufficient kidney donors available to meet the number of potential recipients on the organ waiting list (31).  
44 Dialysis in Korea has also been covered since 1989 and this is similar in France (32, 33). In France, genetic  
45 testing is not routinely offered to patients, although some could have free access to genetic testing (for  
46 example if they were enrolled in the GENKYST observational cohort study (34). In regards to legislative  
47 protection, Australia, France and Korea have comprehensive provisions pertaining to consent, autonomy and  
48  
49  
50  
51  
52  
53  
54  
55  
56  
57  
58  
59  
60

1 integrity of the person tested (35). In France, refusal of fetal testing for ADPKD may be due to fear of  
2 genetic transmission and the illegality of termination of pregnancy after 12-weeks conception due to  
3 ADPKD (36). Variable perspectives can also be noted depending on the role of the participant regardless of  
4  
5 ADPKD (36). Variable perspectives can also be noted depending on the role of the participant regardless of  
6  
7 their country of residence. In previous studies, parents have reported largely positive attitudes towards  
8  
9 testing for children, while some children became more concerned about their health or the health of their  
10  
11 family members (37, 38). Younger patients expressed more anxiety around a diagnosis because they feared  
12  
13 it could limit their future and were anxious about how quickly their health would decline.  
14  
15  
16  
17

18 Similar perspectives on testing have also been noted with other later-onset progressive conditions including  
19  
20 Huntington's disease, characterized by a motor and cognitive deterioration with unpredictable prognosis  
21  
22 leading to similar decisional uncertainty in views about testing (39-41). For patients with Huntington's  
23  
24 disease, family members could be perceived to have a supportive role or put pressure on making decisions in  
25  
26 terms of being pre-symptomatically tested. They considered the consequences of sharing or withholding  
27  
28 information about the diagnosis (42). Some refused testing to avoid unnecessary anxiety before they  
29  
30 experienced symptoms of the disease (42).  
31  
32  
33  
34  
35  
36

37 Our findings are consistent with the concepts of multi-generational transmission process in family system  
38  
39 theory, which emphasizes that an individual's behavior is inextricably connected with the attitudes and  
40  
41 behaviors learned from their family (43). The multi-generational transmission process can help to explain  
42  
43 how decisions about testing can be shaped by observing the extent to which family members (particularly  
44  
45 parents) suffered the symptoms of ADPKD (43). Some patients believed that their experience might be  
46  
47 different from those of their family members and were uncertain about the chance of genetic transmission in  
48  
49 family planning, while others were influenced by the adverse impact that ADPKD had on their family.  
50  
51  
52  
53  
54

55 Our study spanned three countries and provided in-depth, diverse and novel insights about testing for  
56  
57 ADPKD from a relatively large sample of patients and their caregivers purposively selected to include a  
58  
59 range of demographic characteristics. We achieved data saturation, coded the data in the language of the  
60

1 focus groups, and used investigator triangulation in the analysis to ensure the themes reflected the breadth  
2 and depth of the data. However, there are some potential limitations. We are uncertain about the  
3 transferability of the findings to other countries with different healthcare policies on testing. We  
4 acknowledge that testing can be a sensitive topic and some views may have been suppressed in the focus  
5 group setting which may also explain why there was limited variation in the perspectives of caregivers vs.  
6 patients. Other limitations include the relatively low number of caregivers and other subgroups (i.e.,  
7 transplant recipients) and being ethically unable to collect demographic characteristics from patients who  
8 declined to participate.

9 Our findings can inform ways to better inform and communicate with patients and their families. Knowledge  
10 of the available tests, prevention and management may support decision-making. Our findings support the  
11 value of genetic counselors and education sessions prior to testing to help address the potential  
12 psychological and social consequences of testing to the individual and the family (42). Kidney Disease  
13 Improving Global Outcomes (KDIGO) guidelines and the European ADPKD Forum (EAF) suggest that  
14 patients with ADPKD should have access to reproductive counseling (26, 44). However, as few as 20-40%  
15 of nephrologists may actually inform their patients about the prenatal and preimplantation diagnostic options  
16 due to ethical concerns while 68% of ADPKD patients believe it should be offered (30, 45). Clinicians have  
17 articulated similar concerns about testing for ADPKD because of the perceived absence of curative  
18 treatment options and the perceived minimal burden on QoL. However, perceptions of testing may change  
19 with increasing availability and use of vasopressin receptor antagonists to prevent the progression of  
20 ADPKD (46). Ongoing clinical trials may provide additional options for treatment to slow progression (47-  
21 49). Concerns about discrimination in regard to disclosure of genetic status should also be addressed (50).

22 For some patients with ADPKD, testing could empower them to take charge of their health whilst for others,  
23 receiving a confirmed diagnosis of ADPKD causes unnecessary anxiety over a disease that they cannot  
24 control or prevent. Testing positive for ADPKD could jeopardize employment opportunities for patients and  
25 complicate family planning and dynamics. Providing access to education and genetic counseling in people  
26 at-risk of ADPKD and their family, and psychosocial support after receiving the test results, are suggested to

1 provide individuals with the capacity to make informed decisions and to empower them for self-  
2  
3 management.  
4  
5  
6  
7  
8  
9  
10  
11  
12  
13  
14  
15  
16  
17  
18  
19  
20  
21  
22  
23  
24  
25  
26  
27  
28  
29  
30  
31  
32  
33  
34  
35  
36  
37  
38  
39  
40  
41  
42  
43  
44  
45  
46  
47  
48  
49  
50  
51  
52  
53  
54  
55  
56  
57  
58  
59  
60

For peer review only

1 **Disclosure:** Gopala Rangan declares he is site-Investigator of clinical trials sponsored by Sanofi, Otsuka,  
2 Reata, Principal Investigator of the PREVENT-ADPKD clinical trial (funded in part by the NHMRC,  
3 Danone Nutricia – manufacturer of bottled water – PKD Australia, Westmead Medical Research  
4 Foundation) and Chair, Scientific Advisory Board, PKD Australia. All other authors declare that they have  
5 conflict of interest.  
6  
7  
8  
9  
10  
11  
12  
13

#### 14 **Acknowledgement**

15  
16 We are grateful to all the patients and their caregivers who generously gave their time to share their insights  
17 and perspectives.  
18  
19  
20  
21  
22

23 **Funding:** The study was financially supported by a grant from Polycystic Kidney Disease Foundation of  
24 Australia and the National Health and Medical Research Council (NHMRC) Better Evidence and  
25 Translation in Chronic Kidney Disease (BEAT-CKD) Program (1092957), UMR INSERM 1246 – SPHERE  
26 methods in Patients-centered outcomes and Health Research, and Research of Korea Center for Disease  
27 Control & Prevention (2016E3300201). AT is supported by a NHMRC Fellowship (1106716). DJ is  
28 supported by a NHMRC Practitioner Fellowship (1117534). TG is supported by a NHMRC Postgraduate  
29 Scholarship (1169149). MH is funded as a Post-Doctoral Fellow through the NHMRC BEAT-CKD Program  
30 Grant (APP1092957). KEM is supported by a NHMRC Postgraduate Scholarship (1151343). YC is  
31 supported by a NHMRC Early Career Fellowship (1126256). AV receives grant support from the NHMRC  
32 Medical Postgraduate Scholarship (1114539) and the Royal Australasian College of Physicians (Jacquot  
33 NHMRC Award for Excellence)  
34  
35  
36  
37  
38  
39  
40  
41  
42  
43  
44  
45  
46  
47  
48  
49  
50  
51  
52  
53  
54  
55  
56  
57  
58  
59  
60

## References

1. Lanktree MB, Haghighi A, Guiard E, Iliuta IA, Song X, Harris PC, Paterson AD, Pei Y: Prevalence Estimates of Polycystic Kidney and Liver Disease by Population Sequencing. *Journal of the American Society of Nephrology : JASN*, 29: 2593-2600, 2018
2. Gabow PA: Autosomal dominant polycystic kidney disease. *N Engl J Med*, 329: 332-342, 1993
3. Grantham JJ: Polycystic kidney disease: neoplasia in disguise. *Am J Kidney Dis*, 15: 110-116, 1990
4. Higashihara E, Nutahara K, Kojima M, Tamakoshi A, Yoshiyuki O, Sakai H, Kurokawa K: Prevalence and Renal Prognosis of Diagnosed Autosomal Dominant Polycystic Kidney Disease in Japan. *Nephron*, 80: 421-427, 1998
5. Masoumi A, Reed-Gitomer B, Kelleher C, Bekheirnia MR, Schrier RW: Developments in the management of autosomal dominant polycystic kidney disease. *Ther Clin Risk Manag*, 4: 393-407, 2008
6. Cadnapaphornchai MA, George DM, Masoumi A, McFann K, Strain JD, Schrier RW: Effect of statin therapy on disease progression in pediatric ADPKD: Design and baseline characteristics of participants. *Contemporary clinical trials*, 32: 437-445, 2011
7. Chapman AB: Approaches to testing new treatments in autosomal dominant polycystic kidney disease: insights from the CRISP and HALT-PKD studies. *Clin J Am Soc Nephrol*, 3: 1197-1204, 2008
8. Ong ACM, Devuyst O, Knebelmann B, Walz G: Autosomal dominant polycystic kidney disease: the changing face of clinical management. *The Lancet*, 385: 1993-2002, 2015
9. Schrier RW: Optimal care of autosomal dominant polycystic kidney disease patients. *Nephrology (Carlton)*, 11: 124-130, 2006
10. Grantham JJ: Clinical practice. Autosomal dominant polycystic kidney disease. *N Engl J Med*, 359: 1477-1485, 2008
11. Palmer SC, Maggo JK, Campbell KL, Craig JC, Johnson DW, Sutanto B, Ruospo M, Tong A, Strippoli GF: Dietary interventions for adults with chronic kidney disease. *Cochrane Database Syst Rev*, 4: Cd011998, 2017
12. Thomsen HS, Levine E, Meilstrup JW, Van Slyke MA, Edgar KA, Barth JC, Hartman DS: Renal cystic diseases. *Eur Radiol*, 7: 1267-1275, 1997
13. Huang E, Samaniego-Picota M, McCune T, Melancon JK, Montgomery RA, Ugarte R, Kraus E, Womer K, Rabb H, Watnick T: DNA Testing For Live Kidney Donors At Risk For Autosomal Dominant Polycystic Kidney Disease. *Transplantation*, 87: 133-137, 2009
14. Thong KM, Ong AC: The natural history of autosomal dominant polycystic kidney disease: 30-year experience from a single centre. *Qjm*, 106: 639-646, 2013
15. Shaw C, Simms RJ, Pitcher D, Sandford R: Epidemiology of patients in England and Wales with autosomal dominant polycystic kidney disease and end-stage renal failure. *Nephrol Dial Transplant*, 29: 1910-1918, 2014
16. Tchan MS, J.; Patel, C.; Mallett, A.; Tong, A.; Tunnicliffe, D.; Rangan, G.: KHA-CARI autosomal dominant polycystic kidney disease guideline: genetic testing for diagnosis`. *Seminars in Nephrology*, 35: 545-549, 2015
17. Rossler FL, J.: Legislation on genetic testing in different countries. *Pediatric Epidemiology*, 21: 30-40, 2018
18. Miskulin DC, Abebe KZ, Chapman AB, Perrone RD, Steinman TI, Torres VE, Bae KT, Braun W, Winklhofer FT, Hogan MC, Rahbari-Oskoui F, Moore CG, Flessner MF, Schrier RW: Health-related quality of life in patients with autosomal dominant polycystic kidney disease and CKD stages 1-4: a cross-sectional study. *Am J Kidney Dis*, 63: 214-226, 2014
19. Bajwa ZH, Sial KA, Malik AB, Steinman TI: Pain patterns in patients with polycystic kidney disease. *Kidney International*, 66: 1561-1569, 2004
20. Baker A, King D, Marsh J, Makin A, Carr A, Davis C, Kirby C: Understanding the physical and emotional impact of early-stage ADPKD: experiences and perspectives of patients and physicians. *Clin Kidney J*, 8: 531-537, 2015
21. Simms RJ, Thong KM, Dworschak GC, Ong AC: Increased psychosocial risk, depression and reduced quality of life living with autosomal dominant polycystic kidney disease. *Nephrol Dial Transplant*, 31: 1130-1140, 2016
22. Tong A, Rangan GK, Ruospo M, Saglimbene V, Strippoli GFM, Palmer SC, Tunnicliffe DJ, Craig JC: A painful inheritance—patient perspectives on living with polycystic kidney disease: thematic synthesis of qualitative research. *Nephrology Dialysis Transplantation*, 30: 790-800, 2015
23. Cho Y, Sautenet B, Rangan G, Craig JC, Ong ACM, Chapman A, Ahn C, Chen D, Coolican H, Kao JT-W, Gansevoort R, Perrone R, Harris T, Torres V, Pei Y, Kerr PG, Ryan J, Gutman T, Howell M, Ju A, Manera KE, Teixeira-Pinto A, Hamiwka LA, Tong A: Standardised Outcomes in Nephrology—Polycystic Kidney Disease (SONG-PKD): study protocol for establishing a core outcome set in polycystic kidney disease. *Trials*, 18: 560, 2017
24. Tong A, Sainsbury P, Craig J: Consolidated criteria for reporting qualitative research (COREQ): a 32-item checklist for interviews and focus groups. *Int J Qual Health Care*, 19: 349-357, 2007

25. Tong A, Tunnicliffe DJ, Lopez-Vargas P, Mallett A, Patel C, Savige J, Campbell K, Patel M, Tchan MC, Alexander SI, Lee V, Craig JC, Fassett R, Rangan GK: Identifying and integrating consumer perspectives in clinical practice guidelines on autosomal-dominant polycystic kidney disease. *Nephrology*, 21: 122-132, 2016
26. Chapman AB, Devuyt O, Eckardt KU, Gansevoort RT, Harris T, Horie S, Kasiske BL, Odland D, Pei Y, Perrone RD, Pirson Y, Schrier RW, Torra R, Torres VE, Watnick T, Wheeler DC: Autosomal-dominant polycystic kidney disease (ADPKD): executive summary from a Kidney Disease: Improving Global Outcomes (KDIGO) Controversies Conference. *Kidney Int*, 88: 17-27, 2015
27. Glaser BG, Strauss AL, Strutzel E: The Discovery of Grounded Theory; Strategies for Qualitative Research. *Nursing Research*, 17: 364, 1968
28. Denzin N: *Sociological Methods*, New York, Routledge, 2006
29. Park HY, Hong Y-C, Kawachi I, Oh J: Gaps in universal health coverage in South Korea: Association with depression onset in a community cohort. *PLOS ONE*, 13: e0197679, 2018
30. De Rechter S, Kringen J, Janssens P, Liebau MC, Devriendt K, Levtschenko E, Bergmann C, Jouret F, Bammens B, Borry P, Schaefer F, Mekahli D: Clinicians' attitude towards family planning and timing of diagnosis in autosomal dominant polycystic kidney disease. *PLOS ONE*, 12: e0185779, 2017
31. Harris A: The organization and funding of the treatment of end-stage renal disease in Australia. *International Journal of Health Care Finance and Economics*, 7: 113-132, 2007
32. Lee HS, Ju Y-S, Song YR, Kim JK, Choi SR, Joo N, Kim HJ, Park P, Kim SG: Current treatment status and medical costs for hemodialysis vascular access based on analysis of the Korean Health Insurance Database. *Korean J Intern Med*, 33: 1160-1168, 2018
33. Benain JP, Faller B, Briat C, Jacquelinet C, Brami M, Aoustin M, Dubois JP, Rieu P, Behaghel C, Duru G: [Cost of dialysis in France]. *Nephrologie & thérapeutique*, 3: 96-106, 2007
34. Cornec-Le Gall E, Audrézet M-P, Renaudineau E, Hourmant M, Charasse C, Michez E, Frouget T, Vigneau C, Dantal J, Siohan P, Longuet H, Gatault P, Ecotièrre L, Bridoux F, Mandart L, Hanrotel-Saliou C, Stanescu C, Depraetre P, Gie S, Massad M, Kersalé A, Séret G, Augusto J-F, Saliou P, Maestri S, Chen J-M, Harris PC, Férec C, Le Meur Y: PKD2-Related Autosomal Dominant Polycystic Kidney Disease: Prevalence, Clinical Presentation, Mutation Spectrum, and Prognosis. *American journal of kidney diseases : the official journal of the National Kidney Foundation*, 70: 476-485, 2017
35. Clayton EW, Evans BJ, Hazel JW, Rothstein MA: The law of genetic privacy: applications, implications, and limitations. *Journal of Law and the Biosciences*, 6: 1-36, 2019
36. Chaumoitre K, Brun M, Cassart M, Maugey-Laulom B, Eurin D, Didier F, Avni EF: Differential diagnosis of fetal hyperechogenic cystic kidneys unrelated to renal tract anomalies: a multicenter study. *Ultrasound in Obstetrics & Gynecology*, 28: 911-917, 2006
37. Lim Q, McGill BC, Quinn VF, Tucker KM, Mizrahi D, Patenaude AF, Warby M, Cohn RJ, Wakefield CE: Parents' attitudes toward genetic testing of children for health conditions: A systematic review. *Clinical Genetics*, 92: 569-578, 2017
38. Wakefield CE, Hanlon LV, Tucker KM, Patenaude AF, Signorelli C, McLoone JK, Cohn RJ: The psychological impact of genetic information on children: a systematic review. *Genetics Med*, 18: 755, 2016
39. Bates GP, Dorsey R, Gusella JF, Hayden MR, Kay C, Leavitt BR, Nance M, Ross CA, Scahill RI, Wetzel R, Wild EJ, Tabrizi SJ: Huntington disease. *Nat Rev Dis Primers*, 1: 15005, 2015
40. Halvorson CR, Bremmer MS, Jacobs SC: Polycystic kidney disease: inheritance, pathophysiology, prognosis, and treatment. *Int J Nephrol Renovasc Dis*, 3: 69-83, 2010
41. Hagberg A, Bui T-H, Winnberg E: *More Appreciation of Life or Regretting the Test? Experiences of Living as a Mutation Carrier of Huntington's Disease*, 2010
42. Sobel SK, Cowan DB: Impact of genetic testing for Huntington disease on the family system. *Am J Med Genet*, 90: 49-59, 2000
43. Bowen M: The use of family theory in clinical practice. *Comprehensive Psychiatry*, 7: 345-374, 1966
44. co-chairs E, members E, participants R, Harris T, Sandford R: European ADPKD Forum multidisciplinary position statement on autosomal dominant polycystic kidney disease care: European ADPKD Forum and Multispecialist Roundtable participants. *Nephrol Dial Transplant*, 33: 563-573, 2017
45. Swift O, Vilar E, Rahman B, Side L, Gale DP: Attitudes in Patients with Autosomal Dominant Polycystic Kidney Disease Toward Prenatal Diagnosis and Preimplantation Genetic Diagnosis. *Genetic Testing and Molecular Biomarkers*, 20: 741-746, 2016
46. Torres VE, Abebe KZ, Chapman AB, Schrier RW, Braun WE, Steinman TI, Winklhofer FT, Brosnahan G, Czarnecki PG, Hogan MC, Miskulin DC, Rahbari-Oskoui FF, Grantham JJ, Harris PC, Flessner MF, Moore CG, Perrone RD:

1 Angiotensin Blockade in Late Autosomal Dominant Polycystic Kidney Disease. *The New England journal of*  
2 *medicine*, 371: 2267-2276, 2014

- 3 47. Kao CC, Huang SY, Cheng PJ, Shaw SW, Chueh HY, Chang SD, Hsu TY, Kung FT, Hsieh TT: Factors associated with  
4 the intention to recommend pertussis vaccination for postpartum women: a survey in Taiwan of  
5 obstetrician-gynecologists' knowledge, beliefs, and attitudes. *Taiwan*, 51: 222-228, 2012
- 6 48. Hanley SJ, Yoshioka E, Ito Y, Konno R, Hayashi Y, Kishi R, Sakuragi N: Acceptance of and attitudes towards human  
7 papillomavirus vaccination in Japanese mothers of adolescent girls. *Vaccine*, 30: 5740-5747, 2012
- 8 49. Rank C, Gilbert M, Ogilvie G, Jayaraman GC, Marchand R, Trussler T, Hogg RS, Gustafson R, Wong T, ManCount  
9 Study T: Acceptability of human papillomavirus vaccination and sexual experience prior to disclosure to  
10 health care providers among men who have sex with men in Vancouver, Canada: implications for targeted  
11 vaccination programs. *Vaccine*, 30: 5755-5760, 2012
- 12 50. Australian Law Reform Commission AHEC: Essentially Yours - The Protection of Human Genetic Information in  
13 Australia. In: AUSTRALIAN LAW REFORM COMMISSION, A. H. E. C. (Ed.), 2003
- 14  
15  
16  
17  
18  
19  
20  
21  
22  
23  
24  
25  
26  
27  
28  
29  
30  
31  
32  
33  
34  
35  
36  
37  
38  
39  
40  
41  
42  
43  
44  
45  
46  
47  
48  
49  
50  
51  
52  
53  
54  
55  
56  
57  
58  
59  
60

For peer review only



**Table 1. Participant Demographic Characteristics**

| <b>Characteristic</b>                         | <b>Australia<br/>n=85<br/>(%)</b> | <b>France<br/>n=40<br/>(%)</b> | <b>Republic<br/>of Korea<br/>n=29<br/>(%)</b> | <b>All participants<br/>n=154<br/>(%)</b> |
|-----------------------------------------------|-----------------------------------|--------------------------------|-----------------------------------------------|-------------------------------------------|
| <b>Participant status</b>                     |                                   |                                |                                               |                                           |
| Patient                                       | 61 (71)                           | 36 (90)                        | 24 (83)                                       | 121 (78)                                  |
| Caregiver                                     | 24 (28)                           | 4 (10)                         | 5 (17)                                        | 33 (21)                                   |
| <b>Male</b>                                   | 35 (41)                           | 17 (43)                        | 12 (41)                                       | 64 (42)                                   |
| <b>Age (years)</b>                            |                                   |                                |                                               |                                           |
| 18-39                                         | 16 (19)                           | 2 (5)                          | 3 (10)                                        | 21 (14)                                   |
| 40-59                                         | 34 (40)                           | 18 (45)                        | 20 (69)                                       | 72 (47)                                   |
| 60-79                                         | 35 (41)                           | 20 (50)                        | 6 (21)                                        | 61 (40)                                   |
| <b>Highest level of education<sup>^</sup></b> |                                   |                                |                                               |                                           |
| Primary school: grade 6                       | 4 (5)                             | 2 (5)                          | 1 (3)                                         | 7 (5)                                     |
| Secondary school: grade 10                    | 18 (22)                           | 8 (20)                         | 2 (7)                                         | 28 (18)                                   |
| Secondary school: grade 12                    | 7 (8)                             | 14 (35)                        | 5 (17)                                        | 26 (17)                                   |
| Tertiary: certificate/diploma                 | 25 (30)                           | 4 (10)                         | 0 (0)                                         | 29 (19)                                   |
| Tertiary: university degree                   | 29 (35)                           | 12 (30)                        | 21 (72)                                       | 62 (41)                                   |
| <b>Employment</b>                             |                                   |                                |                                               |                                           |
| Full-time                                     | 21 (25)                           | 12 (30)                        | 17 (59)                                       | 50 (32)                                   |
| Part-time or casual                           | 17 (20)                           | 4 (10)                         | 3 (10)                                        | 24 (16)                                   |
| Not employed                                  | 11 (13)                           | 0 (0)                          | 4 (14)                                        | 15 (10)                                   |
| Retired                                       | 28 (33)                           | 19 (48)                        | 2 (7)                                         | 49 (32)                                   |
| Other (e.g. income protection insurance)      | 8 (9)                             | 5 (13)                         | 3 (10)                                        | 16 (10)                                   |
| <b>Ethnicity</b>                              |                                   |                                |                                               |                                           |
| White                                         | 72 (85)                           | 40 (100)                       | 0 (0)                                         | 112 (73)                                  |
| Asian                                         | 7 (19)                            | 0 (0)                          | 29 (100)                                      | 36 (23)                                   |
| Other                                         | 6 (7)                             | 0 (0)                          | 0 (0)                                         | 6 (4)                                     |
| <b>CKD stage<sup>**</sup></b>                 |                                   |                                |                                               |                                           |
| Pre-dialysis                                  | 34 (56)                           | 20 (56)                        | 20 (83)                                       | 74 (61)                                   |
| Dialysis                                      | 11 (18)                           | 2 (6)                          | 3 (13)                                        | 16 (13)                                   |
| Transplantation                               | 16 (26)                           | 14 (39)                        | 1 (4)                                         | 31 (26)                                   |
| <b>Age at diagnosis<sup>^**</sup></b>         |                                   |                                |                                               |                                           |
| 0-20 y                                        | 10 (16)                           | 6 (17)                         | 3 (13)                                        | 19 (16)                                   |
| 21-40 y                                       | 35 (57)                           | 21 (58)                        | 14 (58)                                       | 70 (58)                                   |
| 41-60 y                                       | 13 (21)                           | 7 (19)                         | 6 (25)                                        | 26 (21)                                   |
| >60 y                                         | 3 (5)                             | 2 (6)                          | 1 (4)                                         | 6 (5)                                     |

<sup>^</sup>missing data from 2 participants; <sup>\*\*</sup> patient-only (n=61; n=31; n=24). CKD, chronic kidney disease; ADPKD, autosomal dominant polycystic kidney disease.

**Table 2. Selected illustrative quotations**

| Theme                                                         | Illustrative quotations                                                                                                                                                                                                                                                                                                                                                                                                                                                                                                                                                                                                                                                                                                                                                                                                                                                                                                                                                                                                                                                                                                                                                                                                                              |
|---------------------------------------------------------------|------------------------------------------------------------------------------------------------------------------------------------------------------------------------------------------------------------------------------------------------------------------------------------------------------------------------------------------------------------------------------------------------------------------------------------------------------------------------------------------------------------------------------------------------------------------------------------------------------------------------------------------------------------------------------------------------------------------------------------------------------------------------------------------------------------------------------------------------------------------------------------------------------------------------------------------------------------------------------------------------------------------------------------------------------------------------------------------------------------------------------------------------------------------------------------------------------------------------------------------------------|
| <b>Avoiding financial disadvantage</b>                        |                                                                                                                                                                                                                                                                                                                                                                                                                                                                                                                                                                                                                                                                                                                                                                                                                                                                                                                                                                                                                                                                                                                                                                                                                                                      |
| Insecurity in the inability to obtain life insurance          | <p>I asked many years ago whether I could have testing done on my children and I was told yes, but it's not advised, because if it was proven that either of them were likely to get polycystic kidneys, they would never be able to go on a school camp, and they would never get life insurance. (Australia)</p> <p>He's 21 now and I'm pretty certain he has it and I say to him, "Whatever you do don't get it confirmed, just live your life as long as you can without being diagnosed, without getting it there in writing that you've got it," because superannuation, life insurance, job prospects, all these sorts of things that come up that are going to be detrimental or change his life in some way. (Australia)</p> <p>I actually tried to get some extra life insurance cover through superannuation and they said "yeah, polycystic kidneys, nope can't do it" so I got [doctor] to write a detailed letter about my renal function, and he reckons I'm going to be good for another 20 years, and they still wouldn't insure me. (Australia)</p> <p>If you are not insured in health expenses insurance, you can be reimbursed later on but if you are diagnosed with PKD in your teens then you can't get insured. (Korea)</p> |
| Limited work opportunities                                    | <p>Even applying for jobs now, they ask you about your medical history. If you don't know, you can't write it down. (Australia)</p> <p>When I went for jobs, my job provider turned around and said, "You have to tell them anything that will affect your job". (Australia)</p> <p>My oldest son is in high school and the doctor advised me to organize genetic test for him before he enters army. I think if his test results come back positive and he is unable to attend army that may have a negative impact on his ability to work in future. I worry that it will place him in disadvantaged position (Korea)</p>                                                                                                                                                                                                                                                                                                                                                                                                                                                                                                                                                                                                                          |
| Financial burden                                              | <p>My nephew and his wife were pregnant, and she was going to get a test to see whether his daughter had polycystic kidneys. But the cost was huge, so he didn't do it. (Australia)</p> <p>Genetic testing raises concerns about associated costs. There is added cost when you don't know about diagnosis. Spending a lot of money in advance is a burden. (Korea)</p> <p>My family decided to undergo genetic testing with government support. It's quite expensive for a whole family to do. It would be better if these aspects can be improved to reduce the burden on family. (Korea)</p>                                                                                                                                                                                                                                                                                                                                                                                                                                                                                                                                                                                                                                                      |
| <b>Futility in uncertainty</b>                                |                                                                                                                                                                                                                                                                                                                                                                                                                                                                                                                                                                                                                                                                                                                                                                                                                                                                                                                                                                                                                                                                                                                                                                                                                                                      |
| Erratic and diverse manifestation of disease limiting utility | <p>There are just so many variables in it, and there are plenty of people that die, and didn't even know that they had it, they discovered it in autopsy. I just thought, [genetic testing] was a big call to make for something that could never ever actually develop. (Australia)</p> <p>You don't assume that another person will get those same symptoms... everyone will be different, some similar but not the same. (Australia)</p> <p>Some people can go all through and live to old age and not know. It's just a slower growing cyst, or a different form of PKD. There are some babies that are born with PKD that's not conducive to life. (Australia)</p> <p>There are no two people the same in terms of what works or what, why it started or how quickly it declines. (Australia)</p>                                                                                                                                                                                                                                                                                                                                                                                                                                               |
| Taking preventative actions in vain                           | <p>There's no benefit to knowing early. There is nothing they can do to change the outcome; it's going to happen in its own time at this stage anyhow, so why spoil that young person's life? (Australia)</p> <p>No matter what you're going to go through the process anyway, if you've got it. (Australia)</p> <p>I thought of this [genetic test] very negatively. There is no effective treatment, so why you need to know early. Knowing early without treatment means that you are mentally suffering... you have to live in pain as soon as you know. (Korea)</p> <p>To tell us information when there's no possibility to make things better, is just giving anxiety for nothing. (France)</p>                                                                                                                                                                                                                                                                                                                                                                                                                                                                                                                                               |

1  
2  
3  
4  
5  
6  
7  
8  
9  
10  
11  
12  
13  
14  
15  
16  
17  
18  
19  
20  
21  
22  
23  
24  
25  
26  
27  
28  
29  
30  
31  
32  
33  
34  
35  
36  
37  
38  
39  
40  
41  
42  
43  
44  
45  
46

|                                                  |                                                                                                                                                                                                                                                                                                                                                                                                                                                                                                                                                                                                                                                                                                                                                                                                                                                                                                                                                                                                                                                                                                        |
|--------------------------------------------------|--------------------------------------------------------------------------------------------------------------------------------------------------------------------------------------------------------------------------------------------------------------------------------------------------------------------------------------------------------------------------------------------------------------------------------------------------------------------------------------------------------------------------------------------------------------------------------------------------------------------------------------------------------------------------------------------------------------------------------------------------------------------------------------------------------------------------------------------------------------------------------------------------------------------------------------------------------------------------------------------------------------------------------------------------------------------------------------------------------|
| Daunted by perplexity of results                 | <p>Everyone is not equal before the disease. To teach a young person that he has a sword of Damocles over his head, that he will be dialyzed, maybe grafted may psychologically damage him. (France)</p> <p>He just didn't cope [with his possible diagnosis]. In fact, I even wondered if he was going to do something ghastly to himself. (Australia)</p> <p>I would just rather go through life not having to have that cloud over me at any point. So, if I was in my twenties and somebody said, "Here you can do genetic testing and it will show you've got this," I wouldn't want to. I just don't want to have that limiting my life at that point. (Australia)</p> <p>I have an 18-year-old son, when I broach the subject of him getting tested, what is it going to achieve? It's only going to cause more stress. (Australia)</p>                                                                                                                                                                                                                                                         |
| Unaware of risk of inheriting ADPKD              | <p>Fertility and the genetics of PKD really fascinate me and impact me a lot and that's probably the biggest impact in my life at the moment is whether or not I want to consider passing on the PKD gene, or to adopt, or if I want to terminate if I find out they do have it. (Australia)</p> <p>Knowing at some stage that you've got a possibility of a child having a disease is good because then it can help you with other decisions. (Australia)</p> <p>I'm only 25, I do not have children, and it's true that this is a question I'm asking myself today. What do I do? Have children? Naturally or do I ask to go into a process of assisted reproduction to try to remove that gene. (France)</p> <p>I cried a lot blaming [my mother in law] why my husband had to suffer from this genetically inherited disease.... My biggest wish is that this does not affect my children. (Korea)</p>                                                                                                                                                                                             |
| <b>Lacking autonomy and support in decisions</b> |                                                                                                                                                                                                                                                                                                                                                                                                                                                                                                                                                                                                                                                                                                                                                                                                                                                                                                                                                                                                                                                                                                        |
| Overwhelmed by ambiguous information             | <p>He [doctor] didn't know what to say. Screen or don't screen. (France)</p> <p>I didn't have enough information on that, so I tried to search the internet. (France)</p> <p>No one's ever brought [genetic counseling] up to me, it's always been, "Oh, this is what you're looking forward to, this is what we have to do to your mother," it's never been on the fertility part of it at all and I actually had to go to a fertility doctor to help me. (Australia)</p> <p>[Genetic testing] is rarely offered to us. (France)</p>                                                                                                                                                                                                                                                                                                                                                                                                                                                                                                                                                                  |
| Medicalizing family planning                     | <p>I was a young woman, and [the doctor] said when you get to the point of having children, we can certainly test your fetus to see if it has polycystic kidney disease, and then you could terminate if it did. And I didn't go back to him, 'cause I didn't like that. (Australia)</p> <p>I felt like he thought that was my civic duty to try and eliminate this disease, well if your baby's got polycystic kidney disease, we'll just terminate it and then you can try for another one, and there's a 50% chance that it will or won't, and you could just, terminate any defective ones. (Australia)</p> <p>We cannot detect [ADPKD] before the end date of the abortion authorization. So, this is a debate that leads nowhere, because there is no opportunity to choose. It's either we do not have children at all or we take the risk. (France)</p> <p>Fetus is also a life. If a genetic test finds PKD, are you going to abort the fetus? No. So, if I find out early with fetus in utero, I will feel guilty and have bad feelings. I just don't see why this is necessary. (Korea)</p> |
| Family pressure                                  | <p>If they were planning on having children, I'd potentially encourage them to be tested before then just, so they can keep an extra eye on it. (Australia)</p> <p>[PKD is] a family concern, because she's my sister, she's a bit concerned. So, she wants to make sure that the boys don't have it. (Australia)</p> <p>So, you know, my family's all on my case, oh why don't you get tested? (Australia)</p> <p>You have to follow up. If someone is found in the family, who is affected, then ... I got the report, you have to follow up on the rest of the family too ... they are invited to do some research. (France)</p>                                                                                                                                                                                                                                                                                                                                                                                                                                                                    |
| <b>Seizing control of wellbeing</b>              |                                                                                                                                                                                                                                                                                                                                                                                                                                                                                                                                                                                                                                                                                                                                                                                                                                                                                                                                                                                                                                                                                                        |
| Gaining confidence in early detection            | <p>If you know about it early, you can do some things to help yourself, to prolong [your kidneys] life. Maybe don't have a huge steak and have more vegetables and less protein, lots of water and that sort of thing. (Australia)</p> <p>Personally, I think that it must absolutely be done and know if one is sick or not to anticipate and preserve the maximum [kidney function]. (France)</p>                                                                                                                                                                                                                                                                                                                                                                                                                                                                                                                                                                                                                                                                                                    |

|                                               |                                                                                                                                                                                                                                                                                                                                                                                                                                                                                                                                                                                                                                                                                                                                                                                                                                                                                                                                                                                                                                                                                                                                                                                                                                                  |
|-----------------------------------------------|--------------------------------------------------------------------------------------------------------------------------------------------------------------------------------------------------------------------------------------------------------------------------------------------------------------------------------------------------------------------------------------------------------------------------------------------------------------------------------------------------------------------------------------------------------------------------------------------------------------------------------------------------------------------------------------------------------------------------------------------------------------------------------------------------------------------------------------------------------------------------------------------------------------------------------------------------------------------------------------------------------------------------------------------------------------------------------------------------------------------------------------------------------------------------------------------------------------------------------------------------|
|                                               | <p>I think it may be better to get children tested early. So that parents know, to better look after their health, their diet, care with sport... and then to tell them when they have grown up as adults to allow them to make informed decision (Korea)</p> <p>If you don't know the result of genetic test, as a parent it is very difficult to reinforce the importance of dietary health, so as a parent there is definitely an aspect you want to know (through genetic testing) (Korea)</p>                                                                                                                                                                                                                                                                                                                                                                                                                                                                                                                                                                                                                                                                                                                                               |
| Allowing preparation for the future           | <p>I might've put more away in super rather than running my own business so much, had I known, but that opportunity wasn't there for me because I didn't know at that time. (Australia)</p> <p>I went on dialysis a lot quicker because I was working in a job with huge stress. Now, if I would have known I would have got out of that job years before because I didn't realize that my blood pressure was like 180 over something. (Australia)</p> <p>For someone who has gone on dialysis and sold my business and can't travel, if we had had been educated earlier, we would not have worked so hard, we would have had a holiday, all those things would have been done so we had no regrets later. (Australia)</p>                                                                                                                                                                                                                                                                                                                                                                                                                                                                                                                      |
| Reassurance in family resilience              | <p>This is generational, my mother's father died of it. We've been quite used to it, if there's such a thing as used to it, so our children, I don't think would have a huge impact on them, they would know what to do. (Australia)</p> <p>She was fine after testing, we discussed it, we had all sorts of chats about; what it's going to be in the future and look at some of the other things you could have that would be far worse, and look on the bright side, at least you know about it and we can do preventative stuff. (Australia)</p> <p>When we went and saw the genetic doctor the second time he gave us an actual formal letter and we passed it out throughout our kids, and mainly living cousins, so that if they wanted to go they could ring up and get an appointment, see him and get tested or whatever. (Australia)</p> <p>PKD is hereditary in our family, I just think of it as a quirk, it's just another thing that makes me different and unique so I've been very lucky to watch my grandmother and my father go through it and the way that they've approached it and dealt with it has given me hopefully a good attitude towards it, it doesn't affect me yet so I am lucky, at this stage. (Australia)</p> |
| <b>Anticipating impact on quality of life</b> |                                                                                                                                                                                                                                                                                                                                                                                                                                                                                                                                                                                                                                                                                                                                                                                                                                                                                                                                                                                                                                                                                                                                                                                                                                                  |
| Reassured by lack of symptoms                 | <p>If you're getting towards 40, 50, 60 even and it hasn't bothered you until then, you're not going to be worried about it. (Australia)</p> <p>"Not until you're older." "Oh well, I suppose I'll worry about then." I wouldn't worry about it until I absolutely have to. (Australia)</p> <p>I had children anyhow, even though I did know there was a risk. I was still healthy. I've got four lovely boys, two have got the disease. I do feel a bit of guilt about that for sure, but I wouldn't give any of them back. (Australia)</p> <p>I don't think about it as I have not had any major problems related to the disease, but it's true that I don't have enough perspective to inform me. (France)</p>                                                                                                                                                                                                                                                                                                                                                                                                                                                                                                                                |
| Judging the value of life with ADPKD          | <p>You want your child to have the best life possible and be healthy and happy and everything like that but I don't see I've been ever denied anything or will ever be denied anything in life and if my parents had had the same decision would I exist today? (Australia)</p> <p>I was fairly stubborn that I was never going to have children if I had PKD. I was 100% fixed in my head and nothing was going to change that but I decided I didn't have PKD so it was all right, so I made that error now because I had the two most beautiful children and I really think you've got to be pretty careful in that area because you create beings that are adding quite a bit of value to society. (Australia)</p> <p>My mother said a couple of times if she'd have known; she probably shouldn't have had children. My take on that is I've had a really good 60 years with a bit of intervention, and she had three children without the kidney disease, so I was the only one of four. (Australia)</p> <p>[My mother] said, "If I knew like you, you would not be here. Neither you nor your sister." I have no family. Because, I made the choice not to have children, but I made the right choice. (France)</p>                       |

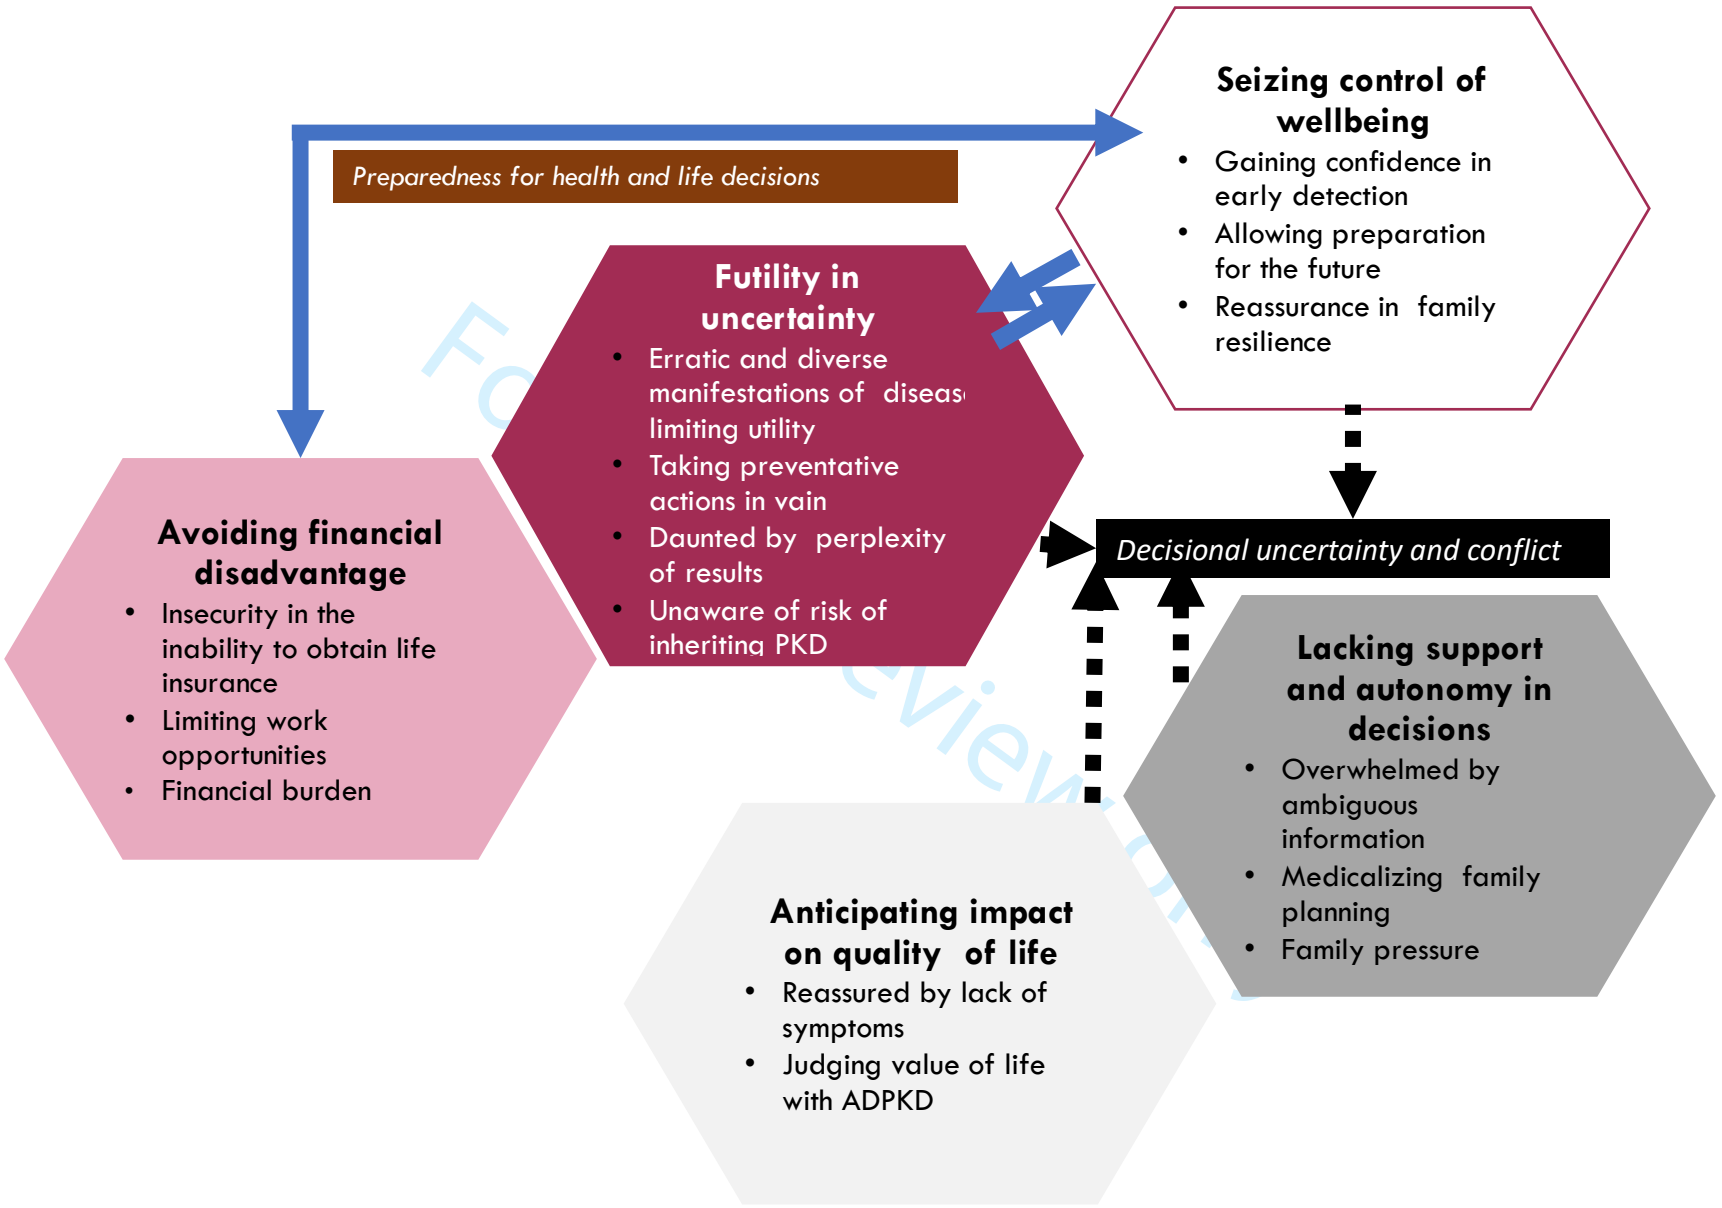

**Figure 1. Thematic Schema.** Participants felt that their ability to take control of their health was influenced by how prepared they were financially and was hindered by the unpredictable nature of their disease symptoms (indicated by the solid lines). Participants often felt that they were conflicted in whether or not they wanted to be tested for PKD. This decisional uncertainty (indicated by the dotted lines) was prompted by the uncertainty in participants symptoms, whether they felt capable of seizing their health, how they anticipated the impact on PKD on the quality of their life and whether or not they had support and autonomy in their decisions.

## Supplementary Material and Methods

### Supplementary Table 1. Question guide

- What are your experiences (or thoughts) of genetic counselling/screening for ADPKD - in people who don't have symptoms but are at risk (i.e. because it is known to occur in the family)?
- What advantages (kidney donation, family planning)/disadvantages (anxiety, financial/insurance, uncertainty of the future) do you think are important when/if you make decisions about genetic screening - why?
- What about for children/family members? Do you think prenatal counselling would be useful/helpful?
- What are some of the emotional, ethical/moral issues around genetic testing for ADPKD?

For peer review only

## COREQ (CONsolidated criteria for REporting Qualitative research) Checklist

A checklist of items that should be included in reports of qualitative research. You must report the page number in your manuscript where you consider each of the items listed in this checklist. If you have not included this information, either revise your manuscript accordingly before submitting or note N/A.

| Topic                                          | Item No. | Guide Questions/Description                                                                                                                              | Reported on Page No. |
|------------------------------------------------|----------|----------------------------------------------------------------------------------------------------------------------------------------------------------|----------------------|
| <b>Domain 1: Research team and reflexivity</b> |          |                                                                                                                                                          |                      |
| <i>Personal characteristics</i>                |          |                                                                                                                                                          |                      |
| Interviewer/facilitator                        | 1        | Which author/s conducted the interview or focus group?                                                                                                   |                      |
| Credentials                                    | 2        | What were the researcher's credentials? E.g. PhD, MD                                                                                                     |                      |
| Occupation                                     | 3        | What was their occupation at the time of the study?                                                                                                      |                      |
| Gender                                         | 4        | Was the researcher male or female?                                                                                                                       |                      |
| Experience and training                        | 5        | What experience or training did the researcher have?                                                                                                     |                      |
| <i>Relationship with participants</i>          |          |                                                                                                                                                          |                      |
| Relationship established                       | 6        | Was a relationship established prior to study commencement?                                                                                              |                      |
| Participant knowledge of the interviewer       | 7        | What did the participants know about the researcher? e.g. personal goals, reasons for doing the research                                                 |                      |
| Interviewer characteristics                    | 8        | What characteristics were reported about the interviewer/facilitator? e.g. Bias, assumptions, reasons and interests in the research topic                |                      |
| <b>Domain 2: Study design</b>                  |          |                                                                                                                                                          |                      |
| <i>Theoretical framework</i>                   |          |                                                                                                                                                          |                      |
| Methodological orientation and Theory          | 9        | What methodological orientation was stated to underpin the study? e.g. grounded theory, discourse analysis, ethnography, phenomenology, content analysis |                      |
| <i>Participant selection</i>                   |          |                                                                                                                                                          |                      |
| Sampling                                       | 10       | How were participants selected? e.g. purposive, convenience, consecutive, snowball                                                                       |                      |
| Method of approach                             | 11       | How were participants approached? e.g. face-to-face, telephone, mail, email                                                                              |                      |
| Sample size                                    | 12       | How many participants were in the study?                                                                                                                 |                      |
| Non-participation                              | 13       | How many people refused to participate or dropped out? Reasons?                                                                                          |                      |
| <i>Setting</i>                                 |          |                                                                                                                                                          |                      |
| Setting of data collection                     | 14       | Where was the data collected? e.g. home, clinic, workplace                                                                                               |                      |
| Presence of non-participants                   | 15       | Was anyone else present besides the participants and researchers?                                                                                        |                      |
| Description of sample                          | 16       | What are the important characteristics of the sample? e.g. demographic data, date                                                                        |                      |
| <i>Data collection</i>                         |          |                                                                                                                                                          |                      |
| Interview guide                                | 17       | Were questions, prompts, guides provided by the authors? Was it pilot tested?                                                                            |                      |
| Repeat interviews                              | 18       | Were repeat interviews carried out? If yes, how many?                                                                                                    |                      |
| Audio/visual recording                         | 19       | Did the research use audio or visual recording to collect the data?                                                                                      |                      |
| Field notes                                    | 20       | Were field notes made during and/or after the interview or focus group?                                                                                  |                      |
| Duration                                       | 21       | What was the duration of the interviews or focus group?                                                                                                  |                      |
| Data saturation                                | 22       | Was data saturation discussed?                                                                                                                           |                      |
| Transcripts returned                           | 23       | Were transcripts returned to participants for comment and/or                                                                                             |                      |

| Topic                                  | Item No. | Guide Questions/Description                                                                                                        | Reported on Page No. |
|----------------------------------------|----------|------------------------------------------------------------------------------------------------------------------------------------|----------------------|
|                                        |          | correction?                                                                                                                        |                      |
| <b>Domain 3: analysis and findings</b> |          |                                                                                                                                    |                      |
| <i>Data analysis</i>                   |          |                                                                                                                                    |                      |
| Number of data coders                  | 24       | How many data coders coded the data?                                                                                               |                      |
| Description of the coding tree         | 25       | Did authors provide a description of the coding tree?                                                                              |                      |
| Derivation of themes                   | 26       | Were themes identified in advance or derived from the data?                                                                        |                      |
| Software                               | 27       | What software, if applicable, was used to manage the data?                                                                         |                      |
| Participant checking                   | 28       | Did participants provide feedback on the findings?                                                                                 |                      |
| <i>Reporting</i>                       |          |                                                                                                                                    |                      |
| Quotations presented                   | 29       | Were participant quotations presented to illustrate the themes/findings?<br>Was each quotation identified? e.g. participant number |                      |
| Data and findings consistent           | 30       | Was there consistency between the data presented and the findings?                                                                 |                      |
| Clarity of major themes                | 31       | Were major themes clearly presented in the findings?                                                                               |                      |
| Clarity of minor themes                | 32       | Is there a description of diverse cases or discussion of minor themes?                                                             |                      |

Developed from: Tong A, Sainsbury P, Craig J. Consolidated criteria for reporting qualitative research (COREQ): a 32-item checklist for interviews and focus groups. *International Journal for Quality in Health Care*. 2007. Volume 19, Number 6: pp. 349 – 357

**Once you have completed this checklist, please save a copy and upload it as part of your submission. DO NOT include this checklist as part of the main manuscript document. It must be uploaded as a separate file.**



# BMJ Open

## **“A sword of Damocles”: Patient and caregiver beliefs, attitudes and perspectives on presymptomatic testing for autosomal dominant polycystic kidney disease – a focus group study**

|                               |                                                                                                                                                                                                                                                                                                                                                                                                                                                                                                                                                                                                                                                                                                                                                                                                                                                                                                                                                                                                                                                                                                                                                                                                                                                                                                                                                                                                                                                                                                                                                                                                                                                                                                                                                                                                                                                                                                                                                                                                                                                                                                                                                                                                                                        |
|-------------------------------|----------------------------------------------------------------------------------------------------------------------------------------------------------------------------------------------------------------------------------------------------------------------------------------------------------------------------------------------------------------------------------------------------------------------------------------------------------------------------------------------------------------------------------------------------------------------------------------------------------------------------------------------------------------------------------------------------------------------------------------------------------------------------------------------------------------------------------------------------------------------------------------------------------------------------------------------------------------------------------------------------------------------------------------------------------------------------------------------------------------------------------------------------------------------------------------------------------------------------------------------------------------------------------------------------------------------------------------------------------------------------------------------------------------------------------------------------------------------------------------------------------------------------------------------------------------------------------------------------------------------------------------------------------------------------------------------------------------------------------------------------------------------------------------------------------------------------------------------------------------------------------------------------------------------------------------------------------------------------------------------------------------------------------------------------------------------------------------------------------------------------------------------------------------------------------------------------------------------------------------|
| Journal:                      | <i>BMJ Open</i>                                                                                                                                                                                                                                                                                                                                                                                                                                                                                                                                                                                                                                                                                                                                                                                                                                                                                                                                                                                                                                                                                                                                                                                                                                                                                                                                                                                                                                                                                                                                                                                                                                                                                                                                                                                                                                                                                                                                                                                                                                                                                                                                                                                                                        |
| Manuscript ID                 | bmjopen-2020-038005.R1                                                                                                                                                                                                                                                                                                                                                                                                                                                                                                                                                                                                                                                                                                                                                                                                                                                                                                                                                                                                                                                                                                                                                                                                                                                                                                                                                                                                                                                                                                                                                                                                                                                                                                                                                                                                                                                                                                                                                                                                                                                                                                                                                                                                                 |
| Article Type:                 | Original research                                                                                                                                                                                                                                                                                                                                                                                                                                                                                                                                                                                                                                                                                                                                                                                                                                                                                                                                                                                                                                                                                                                                                                                                                                                                                                                                                                                                                                                                                                                                                                                                                                                                                                                                                                                                                                                                                                                                                                                                                                                                                                                                                                                                                      |
| Date Submitted by the Author: | 21-Jul-2020                                                                                                                                                                                                                                                                                                                                                                                                                                                                                                                                                                                                                                                                                                                                                                                                                                                                                                                                                                                                                                                                                                                                                                                                                                                                                                                                                                                                                                                                                                                                                                                                                                                                                                                                                                                                                                                                                                                                                                                                                                                                                                                                                                                                                            |
| Complete List of Authors:     | <p>Logeman, Charlotte; The University of Sydney, School of Public Health; Westmead Hospital, Centre for Kidney Research</p> <p>Cho, Yeoungjee; University of Queensland at Princess Alexandra Hospital, Australasian Kidney Trials Network; Princess Alexandra Hospital, Department of Nephrology</p> <p>Sautenet, Benedicte; Centre Hospitalier Régional Universitaire de Tours, Department of Nephrology Hypertension</p> <p>Rangan, Gopala; The Westmead Institute for Medical Research, Centre for Transplant and Renal Research; Westmead Hospital, Department of Renal Medicine</p> <p>Gutman, Talia; The University of Sydney, Sydney School of Public Health; Westmead Hospital, Centre for Kidney Research</p> <p>Craig, Jonathan; Flinders University Faculty of Medicine Nursing and Health Sciences, College of Medicine and Public Health,</p> <p>Ong, Albert; University of Sheffield Medical School, Academic Nephrology Unit, The Henry Wellcome Laboratories for Medical Research</p> <p>Chapman, Arlene; University of Chicago, Department of Medicine</p> <p>Ahn, Curie; Seoul National University, internal medicine</p> <p>Coolican, Helen; Polycystic Kidney Disease Foundation of Australia, Polycystic Kidney Disease Foundation of Australia</p> <p>Tze-Wah Kao, Juliana; Fu Jen Catholic University Hospital, School of Medicine; National Taiwan University Hospital, Department of Internal Medicine</p> <p>Gansevoort, Ron T.; University Medical Center Gronigen, Faculty of Medical Sciences</p> <p>Perrone, R; Tufts University School of Medicine, Division of Nephrology</p> <p>Harris, Tess; PKD International, Head office; PKD International, London office</p> <p>Torres, Vincent; Mayo Clinic, Department of Nephrology and Hypertension</p> <p>Fowler, Kevin; The Voice of the Patient, Kidney Health Initiative</p> <p>Pei, York; University of Toronto, Division of Nephrology and Division of Genomic Medicine</p> <p>Kerr, Peter; Monash Medical Centre, Nephrology</p> <p>Ryan, Jessica; Monash Medical Centre Clayton, Nephrology</p> <p>Johnson, David; Princess Alexandra Hospital, Department of Renal Medicine; The University of Queensland, Australasian Kidney Trials Network</p> |

|                                 |                                                                                                                                                                                                                                                                                                                                                                                                                                                                                                                                                                                                                                                                                                                                                                                                                                                                                                                                                                                                                                                                                                                                                                                                                                                    |
|---------------------------------|----------------------------------------------------------------------------------------------------------------------------------------------------------------------------------------------------------------------------------------------------------------------------------------------------------------------------------------------------------------------------------------------------------------------------------------------------------------------------------------------------------------------------------------------------------------------------------------------------------------------------------------------------------------------------------------------------------------------------------------------------------------------------------------------------------------------------------------------------------------------------------------------------------------------------------------------------------------------------------------------------------------------------------------------------------------------------------------------------------------------------------------------------------------------------------------------------------------------------------------------------|
|                                 | Viecelli, Andrea; University of Queensland, School of Medicine; University of Queensland at Princess Alexandra Hospital, Australasian Kidney Trials Network<br>Geneste, Clair; Centre Hospitalier Régional Universitaire de Tours, Department of Nephrology and Clinical Immunology<br>Kim, Hyunsuk; Seoul National University Hospital, Internal medicine<br>Kim, Yaerim ; Keimyung University College of Medicine, Department of Internal Medicine<br>Howell, Martin; The Children's Hospital at Westmead, Centre for Kidney Research; University of Sydney, School of Public Health<br>Ju, Angela; The University of Sydney, School of Public Health; Westmead Hospital, Centre for Kidney Research<br>Manera , Karine; The University of Sydney, School of Public Health; Westmead Hospital, Centre for Kidney Research<br>Teixeira-Pinto, Armando; The University of Sydney, School of Public Health; Westmead Hospital, Centre for Kidney Research<br>Parasivam, Gayathri ; The University of Sydney Sydney Medical School, Discipline of Genetic Medicine; The Sydney Children's Hospitals Network Randwick and Westmead<br>Tong, Allison; The University of Sydney, School of Public Health; Westmead Hospital, Centre for Kidney Research |
| <b>Primary Subject Heading</b>: | Paediatrics                                                                                                                                                                                                                                                                                                                                                                                                                                                                                                                                                                                                                                                                                                                                                                                                                                                                                                                                                                                                                                                                                                                                                                                                                                        |
| Secondary Subject Heading:      | Genetics and genomics, Mental health, Paediatrics, Public health, Qualitative research                                                                                                                                                                                                                                                                                                                                                                                                                                                                                                                                                                                                                                                                                                                                                                                                                                                                                                                                                                                                                                                                                                                                                             |
| Keywords:                       | GENETICS, Nephrology < INTERNAL MEDICINE, MEDICAL EDUCATION & TRAINING, MENTAL HEALTH, NEPHROLOGY, Paediatric nephrology < NEPHROLOGY                                                                                                                                                                                                                                                                                                                                                                                                                                                                                                                                                                                                                                                                                                                                                                                                                                                                                                                                                                                                                                                                                                              |
|                                 |                                                                                                                                                                                                                                                                                                                                                                                                                                                                                                                                                                                                                                                                                                                                                                                                                                                                                                                                                                                                                                                                                                                                                                                                                                                    |

SCHOLARONE™  
Manuscripts



I, the Submitting Author has the right to grant and does grant on behalf of all authors of the Work (as defined in the below author licence), an exclusive licence and/or a non-exclusive licence for contributions from authors who are: i) UK Crown employees; ii) where BMJ has agreed a CC-BY licence shall apply, and/or iii) in accordance with the terms applicable for US Federal Government officers or employees acting as part of their official duties; on a worldwide, perpetual, irrevocable, royalty-free basis to BMJ Publishing Group Ltd ("BMJ") its licensees and where the relevant Journal is co-owned by BMJ to the co-owners of the Journal, to publish the Work in this journal and any other BMJ products and to exploit all rights, as set out in our [licence](#).

The Submitting Author accepts and understands that any supply made under these terms is made by BMJ to the Submitting Author unless you are acting as an employee on behalf of your employer or a postgraduate student of an affiliated institution which is paying any applicable article publishing charge ("APC") for Open Access articles. Where the Submitting Author wishes to make the Work available on an Open Access basis (and intends to pay the relevant APC), the terms of reuse of such Open Access shall be governed by a Creative Commons licence – details of these licences and which [Creative Commons](#) licence will apply to this Work are set out in our licence referred to above.

Other than as permitted in any relevant BMJ Author's Self Archiving Policies, I confirm this Work has not been accepted for publication elsewhere, is not being considered for publication elsewhere and does not duplicate material already published. I confirm all authors consent to publication of this Work and authorise the granting of this licence.

**“A sword of Damocles”: Patient and caregiver beliefs, attitudes and perspectives on presymptomatic testing for autosomal dominant polycystic kidney disease – a focus group study**

**Author names**

Charlotte Logeman<sup>1,2</sup>, Yeoungjee Cho<sup>3,4,5</sup>, Benedicte Sautenet<sup>6</sup>, Gopala Rangan<sup>7,8</sup>, Talia Gutman<sup>1,2</sup>, Jonathan C Craig<sup>9</sup>, Albert CM Ong<sup>10</sup>, Arlene Chapman<sup>11</sup>, Curie Ahn<sup>12</sup>, Helen Coolican<sup>13</sup>, Juliana Tze-Wah Kao<sup>14,15</sup>, Ron Gansevoort<sup>16</sup>, Ronald Perrone<sup>17</sup>, Tess Harris<sup>18</sup>, Vicente Torres<sup>19</sup>, Kevin Fowler<sup>20</sup>, York Pei<sup>21</sup>, Peter G Kerr<sup>22</sup>, Jessica Ryan<sup>22</sup>, David W Johnson<sup>3,4,5</sup>, Andrea K Viece<sup>3,4</sup>, Clair Geneste<sup>23</sup>, Hyunsuk Kim<sup>12</sup>, Yaerim Kim<sup>10</sup>, Martin Howell<sup>1,2</sup>, Angela Ju<sup>1,2</sup>, Karine E Manera<sup>1,2</sup>, Armando Teixeira-Pinto<sup>1,2</sup>, Gayathri Parasivam<sup>24,25</sup>, Allison Tong<sup>1,2</sup>

**Affiliations of each author**

<sup>1</sup>Sydney School of Public Health, The University of Sydney, Sydney NSW, Australia;

<sup>2</sup>Centre for Kidney Research, The Children's Hospital at Westmead, Sydney NSW, Australia;

<sup>3</sup>Department of Nephrology, Princess Alexandra Hospital, Brisbane, Australia;

<sup>4</sup>Australasian Kidney Trials Network, University of Queensland, Brisbane, Australia;

<sup>5</sup>Translational Research Institute, Brisbane, Australia;

<sup>6</sup>Department of Nephrology Hypertension, Tours Hospital, SPHERE - INSERMU1246, University of Tours and Nantes, Tours, France;

<sup>7</sup>Centre for Transplant and Renal Research, Westmead Institute for Medical Research, The University of Sydney, Australia;

<sup>8</sup>Department of Renal Medicine, Westmead Hospital, Western Sydney Local Health District, Sydney, Australia;

<sup>9</sup>College of Medicine and Public Health, Flinders University;

<sup>10</sup> Department of Internal Medicine, Keimyung University School of Medicine, South Korea;

<sup>11</sup>Department of Medicine, The University of Chicago, United States;

<sup>12</sup>Division of Nephrology, Seoul National University Hospital, South Korea;

1 <sup>13</sup>Polycystic Kidney Disease Foundation of Australia, Australia;

2 <sup>14</sup>School of Medicine, Fu Jen Catholic University and Fu Jen Catholic University Hospital, Taiwan;

3 <sup>15</sup>Department of Internal Medicine, National Taiwan University Hospital, Taiwan;

4 <sup>16</sup>Faculty of Medical Sciences, University Medical Center Gronigen, Netherlands;

5 <sup>17</sup>Division of Nephrology, Tufts Medical Center, Tufts University School of Medicine, United States;

6 <sup>18</sup>Polycystic Kidney Disease International, United Kingdom;

7 <sup>19</sup>Department of Nephrology and Hypertension, Mayo Clinic, United States;

8 <sup>20</sup>Kidney Health Initiative, Patient Family Partnership Council; President, The Voice of the Patient, United States

9 <sup>21</sup>Division of Nephrology and Division of Genomic Medicine, University of Toronto, Canada;

10 <sup>22</sup>Department of Nephrology, Monash Medical Centre and Monash University, Melbourne, Australia;

11 <sup>23</sup>Department of Nephrology and Clinical Immunology, Tours Hospital, University Francois Rabelais;

12 <sup>24</sup>Sydney Children's Hospitals Network, Westmead & Randwick

13 <sup>25</sup>Discipline of Genetic Medicine, Sydney Medical School, University of Sydney

14 **Address for correspondence:**

15 Charlotte Logeman

16 Centre for Kidney Research. The Children's Hospital at Westmead, Westmead, NSW 2145

17 Sydney, Australia

18 Email: [charlotte.logeman@sydney.edu.au](mailto:charlotte.logeman@sydney.edu.au)

19 **Abstract Word Count: 250**

20 **Text Word Count: 3,264**

## Abstract

**Background and objectives:** Presymptomatic testing is available for early diagnosis of hereditary autosomal dominant polycystic kidney disease (ADPKD). However, the complex ethical and psychosocial implications can make decision-making challenging and require an understanding of patients' values, goals and priorities. This study aims to describe patient and caregiver beliefs and expectations regarding presymptomatic testing for ADPKD.

**Design, setting, and participants:** 154 participants (120 patients and 34 caregivers) aged 18 years and over from eight centers in Australia, France and Korea participated in 17 focus groups. Transcripts were analyzed thematically.

**Results:** We identified five themes: *avoiding financial disadvantage* (insecurity in the inability to obtain life insurance, limited work opportunities, financial burden); *futility in uncertainty* (erratic and diverse manifestations of disease limiting utility, taking preventative actions in vain, daunted by perplexity of results, unaware of risk of inheriting ADPKD); *lacking autonomy and support in decisions* (overwhelmed by ambiguous information, medicalizing family planning, family pressures); *seizing control of wellbeing* (gaining confidence in early detection, allowing preparation for the future, reassurance in family resilience); and *anticipating impact on quality of life* (reassured by lack of symptoms, judging value of life with ADPKD).

**Conclusions:** For patients with ADPKD, presymptomatic testing provides an opportunity to take ownership of their health through family planning and preventive measures. However, these decisions can be wrought with tensions and uncertainty about prognostic implications, and the psychosocial and financial burden of testing. Healthcare professionals should focus on genetic counselling, mental health and providing education to patients' families to support informed decision-making. Policymakers should consider the cost-burden and risk of discrimination when informing government policies. Finally, patients are recommended to focus on self-care from an early age.

## Strengths and Limitations of this study

- 1 • The focus groups allowed in-depth exploration of patients views on presymptomatic testing for  
2 autosomal dominant polycystic kidney disease and helped to understand their decision-making  
3 process.  
4  
5
- 6 • The number of participants and the diversity was a strength in this study, including 154 participants  
7 across Australia, France and Korea from both stakeholder groups relevant to this study (caregivers  
8 and patients).  
9
- 10 • Research limitations are common to qualitative research methodology in that the data are not  
11 generalizable and is restricted to the expressed thoughts of participants.  
12
- 13 • We acknowledge sensitive topics may be discussed at the focus groups and some views may have  
14 been suppressed in the focus group setting.  
15  
16  
17  
18  
19  
20  
21  
22  
23  
24  
25  
26  
27  
28  
29  
30  
31  
32  
33  
34  
35  
36  
37  
38  
39  
40  
41  
42  
43  
44  
45  
46  
47  
48  
49  
50  
51  
52  
53  
54  
55  
56  
57

## 58 Introduction

59  
60

1 Autosomal dominant polycystic kidney disease (ADPKD) is the most common inherited kidney disease and  
2 affects about 10% of patients receiving kidney replacement therapy (1). Early phase of ADPKD is often  
3 asymptomatic but the development of kidney cysts leads to increased kidney volume, reduced kidney  
4 function and eventually follows a relentless course towards end-stage kidney disease (ESKD)(2-8). Clinical  
5 management involves pharmacological and lifestyle interventions to control hypertension, slow the  
6 progression of cysts, manage complications (kidney and extra-kidney manifestations), and maintain quality  
7 of life (QoL) (9-11).

18 Diagnosis of ADPKD is usually based on family history, ultrasonography, computed tomography (CT) or  
19 magnetic resonance imaging (MRI) (12). Testing, however, can facilitate the diagnosis of ADPKD in  
20 patients whose kidney phenotypes are atypical or asymptomatic, and in patients with unknown family  
21 history. It may also help identify living donors for kidney transplantation (13-15). However, testing has not  
22 historically been part of routine care and remains controversial in some countries. Typically, countries used  
23 to offer testing when a diagnosis is needed to be confirmed in young patients with unknown family history,  
24 for family planning, to determine eligibility for kidney donation, or when the disease presents in childhood  
25 or adolescence but testing in adults is overall accepted and encouraged (16). In some countries in Europe  
26 and Asia, access to asymptomatic or presymptomatic testing is very restricted or not available (17-20).

41 For the scope of this paper, testing may include any strategy used to identify the presence of ADPKD prior  
42 to symptom onset (including genetic tests, blood tests, imaging such as ultrasound, CT, MRI, etc.) (13).

46 While testing for ADPKD has the potential to support early intervention, patients can suffer from anxiety  
47 and depression from being diagnosed prior to the onset of symptoms (21-24). There are also concerns about  
48 potential discrimination with employment and obtaining life insurance, and strains on social and familial  
49 relationships (16). The genetic aspect of family planning is emotionally challenging as patients contend with  
50 guilt and uncertainty in pursuing parenthood (25). Decision-making about testing is ethically challenging  
51 with psychosocial implications, and requires an understanding of the patients' attitudes, priorities, and  
52 perspectives of testing. The aim of this study was to describe patient and caregiver perspectives on the value



1 and risks of testing to support the development of strategies and interventions for testing for ADPKD that  
2 address their values and needs.  
3  
4  
5  
6

## 7 **Methods**

8  
9  
10

11 This focus group study was conducted as part of the Standardized Outcomes in Nephrology – Polycystic  
12 Kidney Disease (SONG-PKD) Initiative (26). This study is focused on perspectives of patients on testing for  
13 themselves and/or their children. We used the consolidated criteria for reporting qualitative studies  
14 (COREQ) to report the study (27).  
15  
16  
17  
18  
19  
20  
21  
22

### 23 *Participant recruitment and selection*

24  
25  
26  
27

28 Participants were recruited across eight centers in Australia (n=3), France (n=4) and Korea (n=1).

29  
30 Participants were eligible if they spoke English (Australia), French (France) or Korean (Korea), were over  
31 18 years old and diagnosed with ADPKD, or a caregiver. Caregiver refers to family member or support  
32 person and not their healthcare professional. We purposively sampled participants to capture a diverse range  
33 of demographics (age, gender, employment status) and clinical characteristics (stage of CKD, age of  
34 diagnosis, current treatment, comorbidities and complications). Recruiting clinicians identified patients with  
35 ADPKD who could also invite their caregivers. Participants and researchers had no prior relationship.  
36  
37  
38  
39  
40  
41  
42  
43

44 Participants were given information packages to be able to provide informed consent and received  
45 reimbursement (\$USD25 – equivalent in local currency) for travel expenses. The Human Research Ethics  
46 Committees of the Western Sydney Local Health District (HREC2009/6/4,14), Monash Medical Centre  
47 (2010.031), Metro South Health District (17/QPAH/112), France (INSERM/2017) and Republic of Korea  
48 (1709-097-886) approved this study.  
49  
50  
51  
52  
53  
54  
55  
56  
57

### 58 *Patient and public involvement*

59  
60

1 The Standardized Outcomes in Nephrology – Polycystic Kidney Disease (SONG-PKD) Initiative (26) was  
2 developed to ensure outcomes in trials are relevant to patients and other stakeholders. The SONG-PKD  
3 Steering Group comprises of a multidisciplinary team of healthcare professionals and patients with PKD and  
4 was aimed to ultimately develop a core set of outcome domains informed by all stakeholders (including  
5 patients) to be reported in all trials in patients with ADPKD (26). Patients on the Steering Group were  
6 involved in the initial planning and design of the study. Purposively sampling was done across different  
7 centers and patients were able to invite any other patients that would be interested to participate. All  
8 participants were invited to be involved in the following step of SONG-PKD which involved completing a  
9 Delphi survey (26). Results of this survey will be emailed to all participants. The general public were not  
10 involved.

#### 25 *Data collection*

27 The two-hour focus group discussions were conducted from June to November of 2017 until data saturation.  
28 Data saturation was achieved when C.L, Y.C, and A.T agreed that little or no new concepts were arising  
29 from subsequent focus groups. We developed the question guide from the literature and with input from the  
30 research team (supplementary material and methods) (25, 28, 29). Focus groups were convened in a venue  
31 external to the hospital and facilitated by one investigator (English – A.T. (researcher), T.G. (researcher),  
32 Y.C (academic nephrologist); French – B.S (academic nephrologist); Korean – Y.K. (academic  
33 nephrologist)). Focus groups were designed with the intent to have a broad range of demographic and  
34 clinical characteristics (including patients/caregivers, age). We did not consider severity of symptoms a  
35 priori. We did not separate patients from a caregiver as they preferred to participate in the same group. A  
36 co-facilitator recorded field notes. All discussions were audio-recorded and were transcribed.

#### 55 *Data analysis*

1 All transcripts were entered into HyperRESEARCH (Version 3.7) for analysis and coded line-by-line, in the  
2 original language and then translated for investigator triangulation, by C.L.(researcher) (English, French)  
3 and H.K. (academic nephrologist) (Korean) using thematic analysis and drawing on principles from  
4 grounded theory to identify concepts related to perspectives on testing for ADPKD (30). From grounded  
5 theory, we conducted initial coding (memoing) and line-by-line coding of the data, used constant  
6 comparison within and across the transcripts, and inductively identified concepts and themes. In accordance  
7 with thematic analysis, we identified initial concepts and grouped similar concepts into themes. Codes were  
8 grouped by similar concepts into themes and subthemes which were discussed and revised with  
9 A.T./T.G./Y.C./B.S./Y.K. who independently read the translated transcripts. To ensure reliable interpretation  
10 of the translated transcripts, C.L and H.K. were available to give more context of the quotes. Investigator  
11 triangulation ensured that the analysis captured the full range and breadth of the data (31).

## 27 **Results**

28  
29  
30  
31  
32 In total, 154 participants (120 patients, 33 caregivers) participated in 17 focus groups across Australia,  
33 France and Korea. The demographics are shown in Table 1. Participants' age ranged from 19 to 78 years  
34 (mean age 54.5 years) and 67 (42%) were men. Most patients were diagnosed between the ages of 21 to 40  
35 years and the majority of patients were pre-dialysis (n=76, 61%), followed by transplant recipients (n=31,  
36 26%) and those on dialysis (n=19, 13%). The majority of caregivers defined themselves as the spouse or  
37 partner of the patient (n=24, 71%), but also included child (n=2, 6%), daughter-in-law (n=1, 3%), parent  
38 (n=4, 12%) and sibling (n=1, 3%). Reasons for declining to participate included having other commitments  
39 and being too unwell to participate.

40  
41  
42  
43  
44  
45  
46  
47  
48  
49  
50  
51  
52  
53 Five themes were identified with both patients and caregivers contributing to the concept unless otherwise  
54 stated: avoiding financial disadvantage, futility in uncertainty, lacking autonomy and support in making  
55 decisions, seizing control of wellbeing, and anticipating impact on quality of life. Subthemes are described  
56  
57  
58  
59  
60

1 in the following section. Illustrative quotations for each theme are provided in Table 2. The conceptual links  
2 among themes are depicted in Figure 1.  
3  
4  
5  
6

### 7 **Avoiding financial disadvantage**

8  
9  
10

11 *Insecurity in the inability to obtain life insurance:* Some participants (specifically caregivers) were  
12 concerned about patients being labeled as “high risk” when assessed for life insurance and expected they  
13 would pay higher premiums, be unable obtain insurance, or be “dropped” by their insurance provider. They  
14 suspected they would be unfairly penalized for a disease that may not manifest. For this reason, some did not  
15 disclose ADPKD or avoided confirmatory tests – *“Don't get it confirmed, just live your life as long as you*  
16 *can without being diagnosed.”* (caregiver, France). Parents worried that limited insurance would restrict  
17 their children from travelling and from attending school camps.  
18  
19  
20  
21  
22  
23  
24  
25  
26  
27  
28  
29

30 *Limiting work opportunities:* Some patients feared discrimination from employers who could deny or  
31 dismiss them because of a diagnosis. Some worried that the disease would impair their physical ability to  
32 perform at work. Parents considered how the risks of early diagnosis through testing may jeopardize work  
33 opportunities for their children - *“[my] doctor advised me to organize a genetic test for [my son] ... but then*  
34 *I think if his test result comes back positive ... this may have a negative impact on his ability to work in*  
35 *future”* (Australia). Some refused tests and avoided disclosing their medical history to protect employment  
36 prospects.  
37  
38  
39  
40  
41  
42  
43  
44  
45  
46  
47  
48  
49

50 *Financial Burden:* Some pre-symptomatic participants wanted to undergo testing for ADPKD, but the cost  
51 was prohibitive, particularly for participants in Korea, – *“Genetic testing raises concerns about associated*  
52 *cost.... spending a lot of money in advance is a burden”* (Korea). Some believed that a history of ADPKD  
53 warranted reimbursement from the government to improve equity of access to testing.  
54  
55  
56  
57  
58  
59  
60

### **Futility in uncertainty**

1  
2  
3 *Erratic and diverse manifestations of disease limiting utility:* The symptoms of ADPKD were regarded as  
4 unpredictable, such that a diagnosis would not provide useful information about symptom burden and  
5 prognosis. Patients and caregivers believed it was unnecessary to be concerned until symptoms become  
6 apparent – “[confirmatory testing] was a big call to make for something that could never ever actually  
7 develop.” (Australia).  
8  
9  
10  
11  
12  
13  
14  
15

16 *Taking preventative actions in vain:* Participants who had been diagnosed through screening felt frustrated  
17 when attempts to minimize disease progression (e.g. with antihypertensive medications or smoking  
18 cessation) proved futile. Some felt helpless and perceived that testing prior to experiencing symptoms was  
19 useless since they were powerless to change the unpredictable course – “There’s no benefit to knowing  
20 early. There is nothing they can do to change the outcome, it’s going to happen in its own time” (Australia).  
21  
22  
23  
24  
25  
26  
27  
28  
29

30 *Daunted by perplexity of results:* Some parents worried that their child would be overwhelmed in trying to  
31 comprehend or interpret the results from testing and that it would create “a sword of Damocles over [their]  
32 head causing worry, anxiety, depression and even posttraumatic stress disorder” (France).  
33  
34  
35  
36  
37  
38  
39

40 *Unaware of risk of inheriting PKD:* The threat of transmitting the disease to their children caused decisional  
41 conflict about testing. Some felt they would be more empowered by knowing the results – “Knowing that  
42 you’ve got a possibility of a child having a disease is good, it can help you with other decisions” (Australia).  
43 Others struggled with the uncertainty of the impact of tests on decisions about family planning – “probably  
44 the biggest impact in my life at the moment is whether or not I want to consider passing on the PKD gene.”  
45 (Australia). For parents who were diagnosed after having children, they believed that the diagnosis would  
46 not have impacted their decisions and were aware of options such as preimplantation genetic diagnosis –  
47 “Genetically if there was some way of knowing that I was going to pass it on would I take that, or would I  
48 just go ahead and have the child? [...] I would have the child.” (Australia).  
49  
50  
51  
52  
53  
54  
55  
56  
57  
58  
59  
60

## Lacking support and autonomy in decisions

Overwhelmed by ambiguous information: Participants felt “*completely in the dark*” about testing. They struggled with conflicting opinions, such as what age to get screened, and some felt misled by clinicians – “*I remember the specialist [saying to mum], ‘girls don't get polycystic kidney disease so you're fine having two girls,’ so my sister and I lived in oblivion until I was 42*”. (Australia). Some thought that clinicians did not provide adequate genetic counseling. In Australia, some were unaware that a genetic test was available and felt they should be informed. They searched for information on the internet and asked other family members with ADPKD but were disappointed by a general lack of information.

Medicalizing family planning: Some participants regretted having tests when they were advised against having children - “[The doctors said] ‘*don't reproduce, that will stop the disease*’” (Australia). Some diagnosed through screening feared judgment from clinicians and felt pressured against having children. Others appreciated the direct advice in family planning to support their decision – “[The doctors] *told me ‘don't do it’. And I made the choice – no kids.*” (France). Some resisted prenatal testing to avoid having to confront decisions about termination of pregnancy – “*if genetic tests find PKD, are you going to abort the fetus? No. If I found out early with fetus in utero, I will feel guilty and have bad feelings*” (Korea). Some participants in France thought prenatal testing was useless because abortion was illegal – “*When he was in utero, I wanted to abort. At the time, it was not possible.*” (France).

Family pressures: Some thought they should convince their family to get tested – “*From the moment I found that I had it, I wrote to all my relatives, and said, ‘Get screened’*” (Australia). Some parents expected that testing would motivate behavior change to maintain health, and were frustrated when their child did not demonstrate effort to protect their kidney health - “*I keep nagging him to see a doctor, see a specialist, and he goes yeah, doctor said my kidneys are alright.*” (Australia). For some, tests on children were a collective “*family concern*” and decision.

## Seizing control of wellbeing

Gaining confidence from early detection: An early diagnosis through testing was thought to provide an opportunity for participants to take control of their health by modifying their diet and taking preventive medications, such as antihypertensive agents. Participants were empowered to monitor their health vigilantly and gained confidence in their ability to preserve their QoL – “*Going to the doctor regularly, just getting your blood pressure checked, because they say that if you can keep your blood pressure under control, they [kidneys] might not fail.*” (Australia). For parents with a child with ADPKD, an early diagnosis motivated them to educate and “*reinforce the importance of dietary health*” (Korea) in their children.

Allowing preparation for the future: An earlier diagnosis through testing enabled patients to mentally prepare for potential symptom burden and make lifestyle changes (including financial and career planning) to protect their QoL and avoid stress - “*Forewarned is forearmed*” (Australia). Some participants (particularly on dialysis) regretted not getting tested as they would have maximized their time whilst asymptomatic – “*If we had been educated earlier, we would not have worked so hard, we would have had a holiday, all those things would have been done so we had no regrets later*” (Australia).

Reassurance from family resilience: Some observed their parents’ optimism and resilience whilst on dialysis or with a transplant, and this strengthened confidence in their decision to be tested. Some appreciated that testing was more accessible for their children – “*now any of my family can go and get it done*” (Australia).

## Anticipating impact on quality of life

Reassured by lack of symptoms: Some participants were not interested in testing because their QoL had not been affected. They questioned “*well do I actually have it*” and did not worry about their disease or testing – “*I have not had any major problems related to the disease*” (France). Some parents were not concerned with

1 testing or genetic transmission as they believed their child would not suffer a disadvantaged life because  
2 they had not.  
3  
4  
5  
6

7 *Judging the value of life with ADPKD*: Some parents believed they would have decided against having  
8 children if they had been tested because ADPKD had caused their family to suffer - *"If I knew [that I had*  
9 *PKD], you would not be here."* (France). Some participants respected their parents' decisions to have  
10 children but questioned that if they had had been tested *"would I exist today"*? Some did not see the merit in  
11 testing as they valued their lives regardless of ADPKD – *"You've got to be pretty careful in that area*  
12 *because you create beings that are adding quite a bit of value to society."* (Australia).  
13  
14  
15  
16  
17  
18  
19  
20  
21  
22

## 23 Discussion

24  
25  
26  
27  
28 For some patients with ADPKD and caregivers, testing provided an opportunity to gain certainty about their  
29 health status, foster motivation and confidence for self-management, prepare mentally and financially for the  
30 onset of symptomatic disease and seek support from family. However, others perceived testing as futile  
31 because they perceived preventative measures had little impact, and the onset and course of ADPKD were  
32 unpredictable. They were also concerned about interpreting the results and the implications for their current  
33 and future life, which could cause unnecessary worry and anxiety, particularly with regards to family  
34 planning. The costs incurred in accessing testing and the potential financial discrimination they expected to  
35 endure would impose substantial constraints on their lives and futures.  
36  
37  
38  
39  
40  
41  
42  
43  
44  
45  
46  
47

48 Overall, the perspectives of patients and caregivers were similar as they felt inadequately equipped and  
49 conflicted in making decisions, which was exacerbated by a lack of support and information and perceived  
50 pressure from family and healthcare professionals. They were also uncertain about the severity of the  
51 symptom burden, and it was difficult to judge the value of life with ADPKD. Patients who witnessed intense  
52 suffering in their family members with ADPKD were inclined to refuse testing to avoid becoming anxious  
53 about their future and did not expect that the diagnosis would increase their sense of control. Lack of support  
54  
55  
56  
57  
58  
59  
60



1 has been recognized and, through discussions with specialists and patient advocates, this led to the  
2 development of a route map for ADPKD (available in three languages) intended to help patients and all  
3 stakeholders navigate through the services available to them (including genetic testing, diagnostic,  
4 management and treatment options) (18).  
5  
6  
7  
8

9 The variability in policies across the countries and parent-child roles may also explain some differences in  
10 perspectives. The diagnosis of ADPKD using methods other than genetic testing is routinely offered as the  
11 latter is not readily available or accessible in many countries. The cost of testing was of particular concern to  
12 patients in Korea, which may reflect the fact that testing is not funded by the government(32).  
13  
14  
15  
16  
17

18 This has led to an increase in direct-to-consumer genetic testing, which has negative ramifications because  
19 the public is often unaware of their clinical and social implications (32). Korean patients were particularly  
20 concerned about the cost burden of the disease and expressed that they did not understand the added value of  
21 paying for a presymptomatic ultrasound test if cysts may develop later in life. A recent study showed that  
22 more than 70% of Korean patients believed that genetic testing should be included in Korea's national health  
23 testing program so these services can be provided at little expense (33). In Australia, access to dialysis and  
24 transplantation is provided to all citizens via government funded Medicare system (34). Transplantation is  
25 primarily limited due to insufficient kidney donors available to meet the number of potential recipients on  
26 the organ waiting list (34). Dialysis in Korea has also been covered since 1989 and this is similar in France  
27 (35, 36). In France, genetic testing is not routinely offered to patients, although some could have free access  
28 to genetic testing (for example if they were enrolled in the GENKYST observational cohort study (37). In  
29 regards to legislative protection, Australia, France and Korea have comprehensive provisions pertaining to  
30 consent, autonomy and integrity of the person tested (38). In France, refusal of fetal testing for ADPKD may  
31 be due to fear of genetic transmission and the illegality of termination of pregnancy after 12-weeks  
32 conception due to ADPKD (39). No participants mentioned pre-implantation genetic diagnosis, which  
33 highlights an information gap between countries. Variable perspectives can also be noted depending on the  
34 role of the participant regardless of their country of residence. In previous studies, parents have reported  
35 largely positive attitudes towards testing for children, while some children became more concerned about  
36 their health or the health of their family members (40, 41). Younger patients expressed more anxiety around  
37  
38  
39  
40  
41  
42  
43  
44  
45  
46  
47  
48  
49  
50  
51  
52  
53  
54  
55  
56  
57  
58  
59  
60

1 a diagnosis because they feared it could limit their future and were anxious about how quickly their health  
2 would decline.  
3  
4  
5  
6

7 Similar perspectives on testing have also been noted with other later-onset progressive conditions including  
8 Huntington disease, characterized by a motor and cognitive deterioration with unpredictable prognosis  
9 leading to similar decisional uncertainty in views about testing (42-44). For patients with Huntingtondisease,  
10 family members could be perceived to have a supportive role or put pressure on making decisions in terms  
11 of being presymptomatically tested. They considered the consequences of sharing or withholding  
12 information about the diagnosis (45). Some refused testing to avoid unnecessary anxiety before they  
13 experienced symptoms of the disease (45).  
14  
15  
16  
17  
18  
19  
20  
21  
22  
23  
24

25 Our findings are consistent with the concepts of multi-generational transmission process in family system  
26 theory, which emphasizes that an individual's behavior is inextricably connected with the attitudes and  
27 behaviors learned from their family (46, 47). The multi-generational transmission process can help to  
28 explain how decisions about testing can be shaped by observing the extent to which family members  
29 (particularly parents) suffered the symptoms of ADPKD (46). Some patients believed that their experience  
30 might be different from those of their family members and were uncertain about the chance of genetic  
31 transmission in family planning, while others were influenced by the adverse impact that ADPKD had on  
32 their family.  
33  
34  
35  
36  
37  
38  
39  
40  
41  
42  
43  
44  
45

46 Our study spanned three countries and provided in-depth, diverse and novel insights about testing for  
47 ADPKD from a relatively large sample of patients and their caregivers purposively selected to include a  
48 range of demographic characteristics. We achieved data saturation, coded the data in the language of the  
49 focus groups, and used investigator triangulation in the analysis to ensure the themes reflected the breadth  
50 and depth of the data. However, there are some potential limitations. We are uncertain about the  
51 transferability of the findings to other countries with different healthcare policies on testing. We  
52 acknowledge that testing can be a sensitive topic and some views may have been suppressed in the focus  
53  
54  
55  
56  
57  
58  
59  
60

1 group setting which may also explain why there was limited variation in the perspectives of caregivers vs.  
2 patients. We discussed testing for disease presence only in patients diagnosed with ADPKD and 31% were  
3 receiving kidney replacement therapy. We acknowledge that the findings may not include views of at-risk  
4 persons because of ethical reasons. Other limitations include the relatively low number of caregivers and  
5 other subgroups (i.e., transplant recipients) and being ethically unable to collect demographic characteristics  
6 from patients who declined to participate.  
7  
8  
9  
10  
11  
12  
13  
14  
15

16 Our findings can inform ways to better inform and communicate with patients and their families. Knowledge  
17 of the available tests, prevention and management may support decision-making. Our findings support the  
18 value of genetic counselors and education sessions prior to testing to help address the potential  
19 psychological and social consequences of testing to the individual and the family (45). Kidney Disease  
20 Improving Global Outcomes (KDIGO) guidelines and the European ADPKD Forum (EAF) suggest that  
21 patients with ADPKD should have access to reproductive counseling (29, 48). However, as few as 20-40%  
22 of nephrologists may actually inform their patients about the prenatal and preimplantation genetic diagnostic  
23 options due to ethical concerns while 68% of ADPKD patients believe it should be offered (33, 49).  
24 Clinicians have articulated similar concerns about testing for ADPKD because of the perceived absence of  
25 curative treatment options and the perceived minimal burden on QoL. However, perceptions of testing may  
26 change with increasing availability and use of vasopressin receptor antagonists to prevent the progression of  
27 ADPKD (50). Ongoing clinical trials may provide additional options for treatment to slow progression (51-  
28 53). Concerns about discrimination in regard to disclosure of genetic status should also be addressed (54).  
29  
30  
31  
32  
33  
34  
35  
36  
37  
38  
39  
40  
41  
42  
43  
44  
45  
46  
47

48 For some patients with ADPKD, testing could empower them to take charge of their health whilst for others,  
49 receiving a confirmed diagnosis of ADPKD causes unnecessary anxiety over a disease that they limited  
50 control over. Testing positive for ADPKD could jeopardize employment opportunities for patients and  
51 complicate family planning and dynamics. Providing access to education and genetic counseling in people  
52 at-risk of ADPKD and their family, and psychosocial support after receiving the test results, are suggested to  
53  
54  
55  
56  
57  
58  
59  
60

1 provide individuals with the capacity to make informed decisions and to empower them for self-  
2 management.  
3

4  
5  
6 **Contributorship statement:** Conceptualization, G.R., J.C., A.T., C.L., Y.C.; methodology, J.C., A.T-P,  
7 A.T. C.L., Y.C.; software, A.T.; validation, C.L., Y.C., B.S., T.G.; formal analysis, C.L., Y.C., B.S., A.T-P.,  
8 A.T., Y.C., T.G.; investigation, C.L., Y.C., B.S., G.R., T.G., J.C., A.O., A.C., A.C., H.C., J.T.W.K., R.T.G.,  
9 R.P., T.H., V.T., K.F., Y.P., P.K., J.R., D.J., A.V., C.G., K.H., K.Y., M.H., A.J., K.M., A.T-P., G.P. and  
10 A.T. (all authors); resources, A.T.; data curation, Y.C., B.C.; writing—original draft preparation, C.L.;  
11 writing—review and editing, C.L., Y.C., B.S., G.R., T.G., J.C., A.O., A.C., A.C., H.C., J.T.W.K., R.T.G.,  
12 R.P., T.H., V.T., K.F., Y.P., P.K., J.R., D.J., A.V., C.G., K.H., K.Y., M.H., A.J., K.M., A.T-P., G.P. and  
13 A.T. (all authors); visualization, C.L.; supervision, A.T., G.P., Y.C., J.C.; project administration, T.G.,  
14 M.H., A.J., K.M.; funding acquisition, A.T., D.J., T.G., M.H., K.M., Y.C., A.V., B.S. All authors have read  
15 and agreed to the published version of the manuscript.  
16  
17  
18  
19  
20  
21  
22  
23  
24  
25  
26  
27  
28

29  
30 **Competing interests:** Gopala Rangan declares he is site-Investigator of clinical trials sponsored by Sanofi,  
31 Otsuka, Reata, Principal Investigator of the PREVENT-ADPKD clinical trial (funded in part by the  
32 NHMRC, Danone Nutricia – manufacturer of bottled water – PKD Australia, Westmead Medical Research  
33 Foundation) and Chair, Scientific Advisory Board, PKD Australia. Ronald Perrone declares he is site-  
34 Investigator of clinical trials sponsored by Sanofi, Kadmon, Reata, Otsuka, and the US Department of  
35 Defense (TAME PKD), and section editor for Cystic Kidney Disease, UpToDate. All other authors declare  
36 that they have conflict of interest.  
37  
38  
39  
40  
41  
42  
43  
44  
45  
46

#### 47 **Acknowledgement**

48  
49 We are grateful to all the patients and their caregivers who generously gave their time to share their insights  
50 and perspectives.  
51  
52  
53

54  
55 **Funding:** The study was financially supported by a grant from Polycystic Kidney Disease Foundation of  
56 Australia and the National Health and Medical Research Council (NHMRC) Better Evidence and  
57 Translation in Chronic Kidney Disease (BEAT-CKD) Program (1092957), UMR INSERM 1246 – SPHERE  
58 methods in Patients-centered outcomes and Health Research, and Research of Korea Center for Disease  
59  
60

1 Control & Prevention (2016E3300201). AT is supported by a NHMRC Fellowship (1106716). DJ is  
2 supported by a NHMRC Practitioner Fellowship (1117534). TG is supported by a NHMRC Postgraduate  
3 Scholarship (1169149). MH is funded as a Post-Doctoral Fellow through the NHMRC BEAT-CKD Program  
4 Grant (APP1092957). KEM is supported by a NHMRC Postgraduate Scholarship (1151343). YC is  
5 supported by a NHMRC Early Career Fellowship (1126256). AV receives grant support from the NHMRC  
6 Medical Postgraduate Scholarship (1114539) and the Royal Australasian College of Physicians (Jacquot  
7 NHMRC Award for Excellence).

17 **Data Sharing Statement:** Data are available upon reasonable request to achieve aims in the  
18 approved proposal. Data includes deidentified participant data and transcripts from focus groups that  
19 underlie the results reported in this article. The study protocol is also available (26). Data is available from  
20 the corresponding author (<https://orcid.org/0000-0002-8773-1003>).

## References

1. Lanktree MB, Haghighi A, Guiard E, Iliuta IA, Song X, Harris PC, Paterson AD, Pei Y: Prevalence Estimates of Polycystic Kidney and Liver Disease by Population Sequencing. *J Am Soc Nephrol*, 29: 2593-2600, 2018
2. Gabow PA: Autosomal dominant polycystic kidney disease. *N Engl J Med*, 329: 332-342, 1993
3. Grantham JJ: Polycystic kidney disease: neoplasia in disguise. *American journal of kidney diseases : the official journal of the National Kidney Foundation*, 15: 110-116, 1990
4. Higashihara E, Nutahara K, Kojima M, Tamakoshi A, Yoshiyuki O, Sakai H, Kurokawa K: Prevalence and Renal Prognosis of Diagnosed Autosomal Dominant Polycystic Kidney Disease in Japan. *Nephron*, 80: 421-427, 1998
5. Masoumi A, Reed-Gitomer B, Kelleher C, Bekheirnia MR, Schrier RW: Developments in the management of autosomal dominant polycystic kidney disease. *Ther Clin Risk Manag*, 4: 393-407, 2008
6. Cadnapaphornchai MA, George DM, Masoumi A, McFann K, Strain JD, Schrier RW: Effect of statin therapy on disease progression in pediatric ADPKD: Design and baseline characteristics of participants. *Contemp Clin Trials*, 32: 437-445, 2011
7. Chapman AB: Approaches to testing new treatments in autosomal dominant polycystic kidney disease: insights from the CRISP and HALT-PKD studies. *Clin J Am Soc Nephrol*, 3: 1197-1204, 2008
8. Ong ACM, Devuyst O, Knebelmann B, Walz G: Autosomal dominant polycystic kidney disease: the changing face of clinical management. *The Lancet*, 385: 1993-2002, 2015
9. Schrier RW: Optimal care of autosomal dominant polycystic kidney disease patients. *Nephrol*, 11: 124-130, 2006
10. Grantham JJ: Clinical practice. Autosomal dominant polycystic kidney disease. *N Engl J Med*, 359: 1477-1485, 2008
11. Palmer SC, Maggo JK, Campbell KL, Craig JC, Johnson DW, Sutanto B, Ruospo M, Tong A, Strippoli GF: Dietary interventions for adults with chronic kidney disease. *Cochrane Database Syst Rev*, 4: Cd011998, 2017
12. Thomsen HS, Levine E, Meilstrup JW, Van Slyke MA, Edgar KA, Barth JC, Hartman DS: Renal cystic diseases. *Eur Radiol*, 7: 1267-1275, 1997
13. Huang E, Samaniego-Picota M, McCune T, Melancon JK, Montgomery RA, Ugarte R, Kraus E, Womer K, Rabb H, Watnick T: DNA Testing For Live Kidney Donors At Risk For Autosomal Dominant Polycystic Kidney Disease. *Transplantation*, 87: 133-137, 2009
14. Thong KM, Ong AC: The natural history of autosomal dominant polycystic kidney disease: 30-year experience from a single centre. *Qjm*, 106: 639-646, 2013
15. Shaw C, Simms RJ, Pitcher D, Sandford R: Epidemiology of patients in England and Wales with autosomal dominant polycystic kidney disease and end-stage renal failure. *Nephrol Dial Transplant*, 29: 1910-1918, 2014
16. Tchan MS, J.; Patel, C.; Mallett, A.; Tong, A.; Tunnicliffe, D.; Rangan, G.: KHA-CARI autosomal dominant polycystic kidney disease guideline: genetic testing for diagnosis`. *Semin Nephrol*, 35: 545-549, 2015
17. Rossler FL, J.: Legislation on genetic testing in different countries. *Pediatr Epidemiol*, 21: 30-40, 2018
18. co-chairs EAF, Harris T, Sandford R, members EAF, Roundtable p: European ADPKD Forum multidisciplinary position statement on autosomal dominant polycystic kidney disease care: European ADPKD Forum and Multispecialist Roundtable participants. *Nephrology, dialysis, transplantation : official publication of the European Dialysis and Transplant Association - European Renal Association*, 33: 563-573, 2018
19. Gimpel C, Bergmann C, Bockenhauer D, Breysem L, Cadnapaphornchai MA, Cetiner M, Dudley J, Emma F, Konrad M, Harris T, Harris PC, König J, Liebau MC, Marlais M, Mekahli D, Metcalfe AM, Oh J, Perrone RD, Sinha MD, Titieni A, Torra R, Weber S, Winyard PJD, Schaefer F: International consensus statement on the diagnosis and management of autosomal dominant polycystic kidney disease in children and young people. *Nature reviews Nephrology*, 15: 713-726, 2019
20. Horie S, Mochizuki T, Muto S, Hanaoka K, Fukushima Y, Narita I, Nutahara K, Tsuchiya K, Tsuruya K, Kamura K, Nishio S, Suwabe T, Ubara Y, Ishimura E, Nakanishi K, Furukawa K, Kimura K, Matsuo S: Evidence-based clinical practice guidelines for polycystic kidney disease 2014. *Clinical and Experimental Nephrology*, 20: 493-509, 2016
21. Miskulin DC, Abebe KZ, Chapman AB, Perrone RD, Steinman TI, Torres VE, Bae KT, Braun W, Winklhofer FT, Hogan MC, Rahbari-Oskoui F, Moore CG, Flessner MF, Schrier RW: Health-related quality of life in patients with autosomal dominant polycystic kidney disease and CKD stages 1-4: a cross-sectional study. *American journal of kidney diseases : the official journal of the National Kidney Foundation*, 63: 214-226, 2014
22. Bajwa ZH, Sial KA, Malik AB, Steinman TI: Pain patterns in patients with polycystic kidney disease. *Kidney Int*, 66: 1561-1569, 2004

23. Baker A, King D, Marsh J, Makin A, Carr A, Davis C, Kirby C: Understanding the physical and emotional impact of early-stage ADPKD: experiences and perspectives of patients and physicians. *Clin Kidney J*, 8: 531-537, 2015
24. Simms RJ, Thong KM, Dworschak GC, Ong AC: Increased psychosocial risk, depression and reduced quality of life living with autosomal dominant polycystic kidney disease. *Nephrol Dial Transplant*, 31: 1130-1140, 2016
25. Tong A, Rangan GK, Ruospo M, Saglimbene V, Strippoli GFM, Palmer SC, Tunnicliffe DJ, Craig JC: A painful inheritance—patient perspectives on living with polycystic kidney disease: thematic synthesis of qualitative research. *Nephrol Dial Transplant*, 30: 790-800, 2015
26. Cho Y, Sautenet B, Rangan G, Craig JC, Ong ACM, Chapman A, Ahn C, Chen D, Coolican H, Kao JT-W, Gansevoort R, Perrone R, Harris T, Torres V, Pei Y, Kerr PG, Ryan J, Gutman T, Howell M, Ju A, Manera KE, Teixeira-Pinto A, Hamiwka LA, Tong A: Standardised Outcomes in Nephrology—Polycystic Kidney Disease (SONG-PKD): study protocol for establishing a core outcome set in polycystic kidney disease. *Trials*, 18: 560, 2017
27. Tong A, Sainsbury P, Craig J: Consolidated criteria for reporting qualitative research (COREQ): a 32-item checklist for interviews and focus groups. *Int J Qual Health Care*, 19: 349-357, 2007
28. Tong A, Tunnicliffe DJ, Lopez-Vargas P, Mallett A, Patel C, Savige J, Campbell K, Patel M, Tchan MC, Alexander SI, Lee V, Craig JC, Fassett R, Rangan GK: Identifying and integrating consumer perspectives in clinical practice guidelines on autosomal-dominant polycystic kidney disease. *Nephrol*, 21: 122-132, 2016
29. Chapman AB, Devuyt O, Eckardt KU, Gansevoort RT, Harris T, Horie S, Kasiske BL, Odland D, Pei Y, Perrone RD, Pirson Y, Schrier RW, Torra R, Torres VE, Watnick T, Wheeler DC: Autosomal-dominant polycystic kidney disease (ADPKD): executive summary from a Kidney Disease: Improving Global Outcomes (KDIGO) Controversies Conference. *Kidney Int*, 88: 17-27, 2015
30. Glaser BG, Strauss AL, Strutzel E: The Discovery of Grounded Theory; Strategies for Qualitative Research. *Clin Nurs Res*, 17: 364, 1968
31. Denzin N: *Sociological Methods*, New York, Routledge, 2006
32. Kim H: Genetic Counseling in Korean Health Care System. *Journal of Genetic Medicine*, 8: 89, 2011
33. De Rechter S, Kringen J, Janssens P, Liebau MC, Devriendt K, Levtchenko E, Bergmann C, Jouret F, Bammens B, Borry P, Schaefer F, Mekahli D: Clinicians' attitude towards family planning and timing of diagnosis in autosomal dominant polycystic kidney disease. *PLOS ONE*, 12: e0185779, 2017
34. Harris A: The organization and funding of the treatment of end-stage renal disease in Australia. *International Journal of Health Care Finance and Economics*, 7: 113-132, 2007
35. Lee HS, Ju Y-S, Song YR, Kim JK, Choi SR, Joo N, Kim HJ, Park P, Kim SG: Current treatment status and medical costs for hemodialysis vascular access based on analysis of the Korean Health Insurance Database. *Korean J Intern Med*, 33: 1160-1168, 2018
36. Benain JP, Faller B, Briat C, Jacquelinet C, Bami M, Aoustin M, Dubois JP, Rieu P, Behaghel C, Duru G: [Cost of dialysis in France]. *Nephrologie & thérapeutique*, 3: 96-106, 2007
37. Corneec-Le Gall E, Audrézet M-P, Renaudineau E, Hourmant M, Charasse C, Michez E, Frouget T, Vigneau C, Dantal J, Siohan P, Longuet H, Gatault P, Ecotièrre L, Bridoux F, Mandart L, Hanrotel-Saliou C, Stanesco C, Depraetre P, Gie S, Massad M, Kersalé A, Séret G, Augusto J-F, Saliou P, Maestri S, Chen J-M, Harris PC, Férec C, Le Meur Y: PKD2-Related Autosomal Dominant Polycystic Kidney Disease: Prevalence, Clinical Presentation, Mutation Spectrum, and Prognosis. *American journal of kidney diseases : the official journal of the National Kidney Foundation*, 70: 476-485, 2017
38. Clayton EW, Evans BJ, Hazel JW, Rothstein MA: The law of genetic privacy: applications, implications, and limitations. *Journal of Law and the Biosciences*, 6: 1-36, 2019
39. Chaumoitre K, Brun M, Cassart M, Maugey-Laulom B, Eurin D, Didier F, Avni EF: Differential diagnosis of fetal hyperechogenic cystic kidneys unrelated to renal tract anomalies: a multicenter study. *Ultrasound in obstetrics & gynecology : the official journal of the International Society of Ultrasound in Obstetrics and Gynecology*, 28: 911-917, 2006
40. Lim Q, McGill BC, Quinn VF, Tucker KM, Mizrahi D, Patenaude AF, Warby M, Cohn RJ, Wakefield CE: Parents' attitudes toward genetic testing of children for health conditions: A systematic review. *Clinical Genetics*, 92: 569-578, 2017
41. Wakefield CE, Hanlon LV, Tucker KM, Patenaude AF, Signorelli C, McLoone JK, Cohn RJ: The psychological impact of genetic information on children: a systematic review. *Genetics Med*, 18: 755, 2016
42. Bates GP, Dorsey R, Gusella JF, Hayden MR, Kay C, Leavitt BR, Nance M, Ross CA, Scahill RI, Wetzel R, Wild EJ, Tabrizi SJ: Huntington disease. *Nat Rev Dis Primers*, 1: 15005, 2015
43. Halvorson CR, Bremmer MS, Jacobs SC: Polycystic kidney disease: inheritance, pathophysiology, prognosis, and treatment. *Int J Nephrol Renovasc Dis*, 3: 69-83, 2010

- 1 44. Hagberg A, Bui T-H, Winnberg E: *More Appreciation of Life or Regretting the Test? Experiences of Living as a*  
2 *Mutation Carrier of Huntington's Disease*, 2010
- 3 45. Sobel SK, Cowan DB: Impact of genetic testing for Huntington disease on the family system. *Am J Med Genet*, 90:  
4 49-59, 2000
- 5 46. Bowen M: The use of family theory in clinical practice. *Compr Psychiatry*, 7: 345-374, 1966
- 6 47. Young AL, Butow PN, Rhodes P, Tucker KM, Williams R, Healey E, Wakefield CE: Talking across generations:  
7 Family communication about BRCA1 and BRCA2 genetic cancer risk. *Journal of Genetic Counseling*, 28: 516-  
8 532, 2019
- 9 48. co-chairs E, members E, participants R, Harris T, Sandford R: European ADPKD Forum multidisciplinary position  
10 statement on autosomal dominant polycystic kidney disease care: European ADPKD Forum and  
11 Multispecialist Roundtable participants. *Nephrol Dial Transplant*, 33: 563-573, 2017
- 12 49. Swift O, Vilar E, Rahman B, Side L, Gale DP: Attitudes in Patients with Autosomal Dominant Polycystic Kidney  
13 Disease Toward Prenatal Diagnosis and Preimplantation Genetic Diagnosis. *Genet Test Mol Biomarkers*, 20:  
14 741-746, 2016
- 15 50. Torres VE, Abebe KZ, Chapman AB, Schrier RW, Braun WE, Steinman TI, Winklhofer FT, Brosnahan G, Czarnecki  
16 PG, Hogan MC, Miskulin DC, Rahbari-Oskoui FF, Grantham JJ, Harris PC, Flessner MF, Moore CG, Perrone RD:  
17 Angiotensin Blockade in Late Autosomal Dominant Polycystic Kidney Disease. *N Engl J Med*, 371: 2267-2276,  
18 2014
- 19 51. Study of the Efficacy and Safety of Tesevatinib in Subjects With ADPKD.  
20 <https://ClinicalTrials.gov/show/NCT03203642>,
- 21 52. A Medical Research Study Designed to Determine if Venglustat Can be a Future Treatment for ADPKD Patients.  
22 <https://ClinicalTrials.gov/show/NCT03523728>,
- 23 53. An Extended Access Program for Bardoxolone Methyl in Patients With CKD (EAGLE).  
24 <https://ClinicalTrials.gov/show/NCT03749447>,
- 25 54. Australian Law Reform Commission AHEC: Essentially Yours - The Protection of Human Genetic Information in  
26 Australia. In: AUSTRALIAN LAW REFORM COMMISSION, A. H. E. C. (Ed.), 2003
- 27  
28  
29  
30  
31  
32  
33  
34  
35  
36  
37  
38  
39  
40  
41  
42  
43  
44  
45  
46  
47  
48  
49  
50  
51  
52  
53  
54  
55  
56  
57  
58  
59  
60



**Figure 1. Thematic Schema**

1  
2  
3  
4  
5  
6  
7  
8  
9  
10  
11  
12  
13  
14  
15  
16  
17  
18  
19  
20  
21  
22  
23  
24  
25  
26  
27  
28  
29  
30  
31  
32  
33  
34  
35  
36  
37  
38  
39  
40  
41  
42  
43  
44  
45  
46  
47  
48  
49  
50  
51  
52  
53  
54  
55  
56  
57  
58  
59  
60

For peer review only

**Table 1. Participant Demographic Characteristics**

| Characteristic                                | Australia<br>n=85<br>(%) | France<br>n=40<br>(%) | Republic<br>of Korea<br>n=29<br>(%) | All participants<br>n=154<br>(%) |
|-----------------------------------------------|--------------------------|-----------------------|-------------------------------------|----------------------------------|
| <b>Participant status</b>                     |                          |                       |                                     |                                  |
| Patient                                       | 61 (71)                  | 36 (90)               | 24 (83)                             | 121 (78)                         |
| Caregiver                                     | 24 (28)                  | 4 (10)                | 5 (17)                              | 33 (21)                          |
| <b>Male</b>                                   | 35 (41)                  | 17 (43)               | 12 (41)                             | 64 (42)                          |
| <b>Age (years)</b>                            |                          |                       |                                     |                                  |
| 18-39                                         | 16 (19)                  | 2 (5)                 | 3 (10)                              | 21 (14)                          |
| 40-59                                         | 34 (40)                  | 18 (45)               | 20 (69)                             | 72 (47)                          |
| 60-79                                         | 35 (41)                  | 20 (50)               | 6 (21)                              | 61 (40)                          |
| <b>Highest level of education<sup>^</sup></b> |                          |                       |                                     |                                  |
| Primary school: grade 6                       | 4 (5)                    | 2 (5)                 | 1 (3)                               | 7 (5)                            |
| Secondary school: grade 10                    | 18 (22)                  | 8 (20)                | 2 (7)                               | 28 (18)                          |
| Secondary school: grade 12                    | 7 (8)                    | 14 (35)               | 5 (17)                              | 26 (17)                          |
| Tertiary: certificate/diploma                 | 25 (30)                  | 4 (10)                | 0 (0)                               | 29 (19)                          |
| Tertiary: university degree                   | 29 (35)                  | 12 (30)               | 21 (72)                             | 62 (41)                          |
| <b>Employment</b>                             |                          |                       |                                     |                                  |
| Full-time                                     | 21 (25)                  | 12 (30)               | 17 (59)                             | 50 (32)                          |
| Part-time or casual                           | 17 (20)                  | 4 (10)                | 3 (10)                              | 24 (16)                          |
| Not employed                                  | 11 (13)                  | 0 (0)                 | 4 (14)                              | 15 (10)                          |
| Retired                                       | 28 (33)                  | 19 (48)               | 2 (7)                               | 49 (32)                          |
| Other (e.g. income protection insurance)      | 8 (9)                    | 5 (13)                | 3 (10)                              | 16 (10)                          |
| <b>Ethnicity</b>                              |                          |                       |                                     |                                  |
| White                                         | 72 (85)                  | 40 (100)              | 0 (0)                               | 112 (73)                         |
| Asian                                         | 7 (19)                   | 0 (0)                 | 29 (100)                            | 36 (23)                          |
| Other                                         | 6 (7)                    | 0 (0)                 | 0 (0)                               | 6 (4)                            |
| <b>CKD stage<sup>**</sup></b>                 |                          |                       |                                     |                                  |
| Pre-dialysis                                  | 34 (56)                  | 20 (56)               | 20 (83)                             | 74 (61)                          |
| Dialysis                                      | 11 (18)                  | 2 (6)                 | 3 (13)                              | 16 (13)                          |
| Transplantation                               | 16 (26)                  | 14 (39)               | 1 (4)                               | 31 (26)                          |
| <b>Age at diagnosis<sup>^**</sup></b>         |                          |                       |                                     |                                  |
| 0-20 y                                        | 10 (16)                  | 6 (17)                | 3 (13)                              | 19 (16)                          |
| 21-40 y                                       | 35 (57)                  | 21 (58)               | 14 (58)                             | 70 (58)                          |
| 41-60 y                                       | 13 (21)                  | 7 (19)                | 6 (25)                              | 26 (21)                          |
| >60 y                                         | 3 (5)                    | 2 (6)                 | 1 (4)                               | 6 (5)                            |

<sup>^</sup>missing data from 2 participants; <sup>\*\*</sup> patient-only (n=61; n=31; n=24). CKD, chronic kidney disease; ADPKD, autosomal dominant polycystic kidney disease.

**Table 2. Selected illustrative quotations**

| Theme                                                         | Illustrative quotations                                                                                                                                                                                                                                                                                                                                                                                                                                                                                                                                                                                                                                                                                                                                                                                                                                                                                                                                                                                                                                                                                                                                                                                                                              |
|---------------------------------------------------------------|------------------------------------------------------------------------------------------------------------------------------------------------------------------------------------------------------------------------------------------------------------------------------------------------------------------------------------------------------------------------------------------------------------------------------------------------------------------------------------------------------------------------------------------------------------------------------------------------------------------------------------------------------------------------------------------------------------------------------------------------------------------------------------------------------------------------------------------------------------------------------------------------------------------------------------------------------------------------------------------------------------------------------------------------------------------------------------------------------------------------------------------------------------------------------------------------------------------------------------------------------|
| <b>Avoiding financial disadvantage</b>                        |                                                                                                                                                                                                                                                                                                                                                                                                                                                                                                                                                                                                                                                                                                                                                                                                                                                                                                                                                                                                                                                                                                                                                                                                                                                      |
| Insecurity in the inability to obtain life insurance          | <p>I asked many years ago whether I could have testing done on my children and I was told yes, but it's not advised, because if it was proven that either of them were likely to get polycystic kidneys, they would never be able to go on a school camp, and they would never get life insurance. (Australia)</p> <p>He's 21 now and I'm pretty certain he has it and I say to him, "Whatever you do don't get it confirmed, just live your life as long as you can without being diagnosed, without getting it there in writing that you've got it," because superannuation, life insurance, job prospects, all these sorts of things that come up that are going to be detrimental or change his life in some way. (Australia)</p> <p>I actually tried to get some extra life insurance cover through superannuation and they said "yeah, polycystic kidneys, nope can't do it" so I got [doctor] to write a detailed letter about my renal function, and he reckons I'm going to be good for another 20 years, and they still wouldn't insure me. (Australia)</p> <p>If you are not insured in health expenses insurance, you can be reimbursed later on but if you are diagnosed with PKD in your teens then you can't get insured. (Korea)</p> |
| Limited work opportunities                                    | <p>Even applying for jobs now, they ask you about your medical history. If you don't know, you can't write it down. (Australia)</p> <p>When I went for jobs, my job provider turned around and said, "You have to tell them anything that will affect your job". (Australia)</p> <p>My oldest son is in high school and the doctor advised me to organize genetic test for him before he enters army. I think if his test results come back positive and he is unable to attend army that may have a negative impact on his ability to work in future. I worry that it will place him in disadvantaged position (Korea)</p>                                                                                                                                                                                                                                                                                                                                                                                                                                                                                                                                                                                                                          |
| Financial burden                                              | <p>My nephew and his wife were pregnant, and she was going to get a test to see whether his daughter had polycystic kidneys. But the cost was huge, so he didn't do it. (Australia)</p> <p>Genetic testing raises concerns about associated costs. There is added cost when you don't know about diagnosis. Spending a lot of money in advance is a burden. (Korea)</p> <p>My family decided to undergo genetic testing with government support. It's quite expensive for a whole family to do. It would be better if these aspects can be improved to reduce the burden on family. (Korea)</p>                                                                                                                                                                                                                                                                                                                                                                                                                                                                                                                                                                                                                                                      |
| <b>Futility in uncertainty</b>                                |                                                                                                                                                                                                                                                                                                                                                                                                                                                                                                                                                                                                                                                                                                                                                                                                                                                                                                                                                                                                                                                                                                                                                                                                                                                      |
| Erratic and diverse manifestation of disease limiting utility | <p>There are just so many variables in it, and there are plenty of people that die, and didn't even know that they had it, they discovered it in autopsy. I just thought, [genetic testing] was a big call to make for something that could never ever actually develop. (Australia)</p> <p>You don't assume that another person will get those same symptoms... everyone will be different, some similar but not the same. (Australia)</p> <p>Some people can go all through and live to old age and not know. It's just a slower growing cyst, or a different form of PKD. There are some babies that are born with PKD that's not conducive to life. (Australia)</p> <p>There are no two people the same in terms of what works or what, why it started or how quickly it declines. (Australia)</p>                                                                                                                                                                                                                                                                                                                                                                                                                                               |
| Taking preventative actions in vain                           | <p>There's no benefit to knowing early. There is nothing they can do to change the outcome; it's going to happen in its own time at this stage anyhow, so why spoil that young person's life? (Australia)</p> <p>No matter what you're going to go through the process anyway, if you've got it. (Australia)</p> <p>I thought of this [genetic test] very negatively. There is no effective treatment, so why you need to know early. Knowing early without treatment means that you are mentally suffering... you have to live in pain as soon as you know. (Korea)</p> <p>To tell us information when there's no possibility to make things better, is just giving anxiety for nothing. (France)</p>                                                                                                                                                                                                                                                                                                                                                                                                                                                                                                                                               |

1  
2  
3  
4  
5  
6  
7  
8  
9  
10  
11  
12  
13  
14  
15  
16  
17  
18  
19  
20  
21  
22  
23  
24  
25  
26  
27  
28  
29  
30  
31  
32  
33  
34  
35  
36  
37  
38  
39  
40  
41  
42  
43  
44  
45  
46

|                                                  |                                                                                                                                                                                                                                                                                                                                                                                                                                                                                                                                                                                                                                                                                                                                                                                                                                                                                                                                                                                                                                                                                                        |
|--------------------------------------------------|--------------------------------------------------------------------------------------------------------------------------------------------------------------------------------------------------------------------------------------------------------------------------------------------------------------------------------------------------------------------------------------------------------------------------------------------------------------------------------------------------------------------------------------------------------------------------------------------------------------------------------------------------------------------------------------------------------------------------------------------------------------------------------------------------------------------------------------------------------------------------------------------------------------------------------------------------------------------------------------------------------------------------------------------------------------------------------------------------------|
| Daunted by perplexity of results                 | <p>Everyone is not equal before the disease. To teach a young person that he has a sword of Damocles over his head, that he will be dialyzed, maybe grafted may psychologically damage him. (France)</p> <p>He just didn't cope [with his possible diagnosis]. In fact, I even wondered if he was going to do something ghastly to himself. (Australia)</p> <p>I would just rather go through life not having to have that cloud over me at any point. So, if I was in my twenties and somebody said, "Here you can do genetic testing and it will show you've got this," I wouldn't want to. I just don't want to have that limiting my life at that point. (Australia)</p> <p>I have an 18-year-old son, when I broach the subject of him getting tested, what is it going to achieve? It's only going to cause more stress. (Australia)</p>                                                                                                                                                                                                                                                         |
| Unaware of risk of inheriting ADPKD              | <p>Fertility and the genetics of PKD really fascinate me and impact me a lot and that's probably the biggest impact in my life at the moment is whether or not I want to consider passing on the PKD gene, or to adopt, or if I want to terminate if I find out they do have it. (Australia)</p> <p>Knowing at some stage that you've got a possibility of a child having a disease is good because then it can help you with other decisions. (Australia)</p> <p>I'm only 25, I do not have children, and it's true that this is a question I'm asking myself today. What do I do? Have children? Naturally or do I ask to go into a process of assisted reproduction to try to remove that gene. (France)</p> <p>I cried a lot blaming [my mother in law] why my husband had to suffer from this genetically inherited disease.... My biggest wish is that this does not affect my children. (Korea)</p>                                                                                                                                                                                             |
| <b>Lacking autonomy and support in decisions</b> |                                                                                                                                                                                                                                                                                                                                                                                                                                                                                                                                                                                                                                                                                                                                                                                                                                                                                                                                                                                                                                                                                                        |
| Overwhelmed by ambiguous information             | <p>He [doctor] didn't know what to say. Screen or don't screen. (France)</p> <p>I didn't have enough information on that, so I tried to search the internet. (France)</p> <p>No one's ever brought [genetic counseling] up to me, it's always been, "Oh, this is what you're looking forward to, this is what we have to do to your mother," it's never been on the fertility part of it at all and I actually had to go to a fertility doctor to help me. (Australia)</p> <p>[Genetic testing] is rarely offered to us. (France)</p>                                                                                                                                                                                                                                                                                                                                                                                                                                                                                                                                                                  |
| Medicalizing family planning                     | <p>I was a young woman, and [the doctor] said when you get to the point of having children, we can certainly test your fetus to see if it has polycystic kidney disease, and then you could terminate if it did. And I didn't go back to him, 'cause I didn't like that. (Australia)</p> <p>I felt like he thought that was my civic duty to try and eliminate this disease, well if your baby's got polycystic kidney disease, we'll just terminate it and then you can try for another one, and there's a 50% chance that it will or won't, and you could just, terminate any defective ones. (Australia)</p> <p>We cannot detect [ADPKD] before the end date of the abortion authorization. So, this is a debate that leads nowhere, because there is no opportunity to choose. It's either we do not have children at all or we take the risk. (France)</p> <p>Fetus is also a life. If a genetic test finds PKD, are you going to abort the fetus? No. So, if I find out early with fetus in utero, I will feel guilty and have bad feelings. I just don't see why this is necessary. (Korea)</p> |
| Family pressure                                  | <p>If they were planning on having children, I'd potentially encourage them to be tested before then just, so they can keep an extra eye on it. (Australia)</p> <p>[PKD is] a family concern, because she's my sister, she's a bit concerned. So, she wants to make sure that the boys don't have it. (Australia)</p> <p>So, you know, my family's all on my case, oh why don't you get tested? (Australia)</p> <p>You have to follow up. If someone is found in the family, who is affected, then ... I got the report, you have to follow up on the rest of the family too ... they are invited to do some research. (France)</p>                                                                                                                                                                                                                                                                                                                                                                                                                                                                    |
| <b>Seizing control of wellbeing</b>              |                                                                                                                                                                                                                                                                                                                                                                                                                                                                                                                                                                                                                                                                                                                                                                                                                                                                                                                                                                                                                                                                                                        |
| Gaining confidence in early detection            | <p>If you know about it early, you can do some things to help yourself, to prolong [your kidneys] life. Maybe don't have a huge steak and have more vegetables and less protein, lots of water and that sort of thing. (Australia)</p> <p>Personally, I think that it must absolutely be done and know if one is sick or not to anticipate and preserve the maximum [kidney function]. (France)</p>                                                                                                                                                                                                                                                                                                                                                                                                                                                                                                                                                                                                                                                                                                    |

|                                               |                                                                                                                                                                                                                                                                                                                                                                                                                                                                                                                                                                                                                                                                                                                                                                                                                                                                                                                                                                                                                                                                                                                                                                                                                                                  |
|-----------------------------------------------|--------------------------------------------------------------------------------------------------------------------------------------------------------------------------------------------------------------------------------------------------------------------------------------------------------------------------------------------------------------------------------------------------------------------------------------------------------------------------------------------------------------------------------------------------------------------------------------------------------------------------------------------------------------------------------------------------------------------------------------------------------------------------------------------------------------------------------------------------------------------------------------------------------------------------------------------------------------------------------------------------------------------------------------------------------------------------------------------------------------------------------------------------------------------------------------------------------------------------------------------------|
|                                               | <p>I think it may be better to get children tested early. So that parents know, to better look after their health, their diet, care with sport... and then to tell them when they have grown up as adults to allow them to make informed decision (Korea)</p> <p>If you don't know the result of genetic test, as a parent it is very difficult to reinforce the importance of dietary health, so as a parent there is definitely an aspect you want to know (through genetic testing) (Korea)</p>                                                                                                                                                                                                                                                                                                                                                                                                                                                                                                                                                                                                                                                                                                                                               |
| Allowing preparation for the future           | <p>I might've put more away in super rather than running my own business so much, had I known, but that opportunity wasn't there for me because I didn't know at that time. (Australia)</p> <p>I went on dialysis a lot quicker because I was working in a job with huge stress. Now, if I would have known I would have got out of that job years before because I didn't realize that my blood pressure was like 180 over something. (Australia)</p> <p>For someone who has gone on dialysis and sold my business and can't travel, if we had had been educated earlier, we would not have worked so hard, we would have had a holiday, all those things would have been done so we had no regrets later. (Australia)</p>                                                                                                                                                                                                                                                                                                                                                                                                                                                                                                                      |
| Reassurance in family resilience              | <p>This is generational, my mother's father died of it. We've been quite used to it, if there's such a thing as used to it, so our children, I don't think would have a huge impact on them, they would know what to do. (Australia)</p> <p>She was fine after testing, we discussed it, we had all sorts of chats about; what it's going to be in the future and look at some of the other things you could have that would be far worse, and look on the bright side, at least you know about it and we can do preventative stuff. (Australia)</p> <p>When we went and saw the genetic doctor the second time he gave us an actual formal letter and we passed it out throughout our kids, and mainly living cousins, so that if they wanted to go they could ring up and get an appointment, see him and get tested or whatever. (Australia)</p> <p>PKD is hereditary in our family, I just think of it as a quirk, it's just another thing that makes me different and unique so I've been very lucky to watch my grandmother and my father go through it and the way that they've approached it and dealt with it has given me hopefully a good attitude towards it, it doesn't affect me yet so I am lucky, at this stage. (Australia)</p> |
| <b>Anticipating impact on quality of life</b> |                                                                                                                                                                                                                                                                                                                                                                                                                                                                                                                                                                                                                                                                                                                                                                                                                                                                                                                                                                                                                                                                                                                                                                                                                                                  |
| Reassured by lack of symptoms                 | <p>If you're getting towards 40, 50, 60 even and it hasn't bothered you until then, you're not going to be worried about it. (Australia)</p> <p>"Not until you're older." "Oh well, I suppose I'll worry about then." I wouldn't worry about it until I absolutely have to. (Australia)</p> <p>I had children anyhow, even though I did know there was a risk. I was still healthy. I've got four lovely boys, two have got the disease. I do feel a bit of guilt about that for sure, but I wouldn't give any of them back. (Australia)</p> <p>I don't think about it as I have not had any major problems related to the disease, but it's true that I don't have enough perspective to inform me. (France)</p>                                                                                                                                                                                                                                                                                                                                                                                                                                                                                                                                |
| Judging the value of life with ADPKD          | <p>You want your child to have the best life possible and be healthy and happy and everything like that but I don't see I've been ever denied anything or will ever be denied anything in life and if my parents had had the same decision would I exist today? (Australia)</p> <p>I was fairly stubborn that I was never going to have children if I had PKD. I was 100% fixed in my head and nothing was going to change that but I decided I didn't have PKD so it was all right, so I made that error now because I had the two most beautiful children and I really think you've got to be pretty careful in that area because you create beings that are adding quite a bit of value to society. (Australia)</p> <p>My mother said a couple of times if she'd have known; she probably shouldn't have had children. My take on that is I've had a really good 60 years with a bit of intervention, and she had three children without the kidney disease, so I was the only one of four. (Australia)</p> <p>[My mother] said, "If I knew like you, you would not be here. Neither you nor your sister." I have no family. Because, I made the choice not to have children, but I made the right choice. (France)</p>                       |



**Figure 1. Thematic Schema.** Participants felt that their ability to take control of their health was influenced by how prepared they were financially and was hindered by the unpredictable nature of their disease symptoms (indicated by the solid lines). Participants often felt that they were conflicted in whether or not they wanted to be tested for PKD. This decisional uncertainty (indicated by the dotted lines) was prompted by the uncertainty in participants symptoms, whether they felt capable of seizing their health, how they anticipated the impact on PKD on the quality of their life and whether or not they had support and autonomy in their decisions.

## Supplementary Material and Methods

### Supplementary Table 1. Question guide

- What are your experiences (or thoughts) of genetic counselling/screening for ADPKD - in people who don't have symptoms but are at risk (i.e. because it is known to occur in the family)?
- What advantages (kidney donation, family planning)/disadvantages (anxiety, financial/insurance, uncertainty of the future) do you think are important when/if you make decisions about genetic screening - why?
- What about for children/family members? Do you think prenatal counselling would be useful/helpful?
- What are some of the emotional, ethical/moral issues around genetic testing for ADPKD?

### Supplementary Table 2. Attendance in focus groups

| Group ID | Country   | N  |
|----------|-----------|----|
| 1        | Australia | 9  |
| 2        | Australia | 10 |
| 3        | Australia | 6  |
| 4        | Australia | 9  |
| 5        | Australia | 10 |
| 6        | Australia | 6  |
| 7        | Australia | 8  |
| 8        | Australia | 7  |
| 9        | Australia | 7  |
| 10       | Australia | 13 |
| 11       | France    | 6  |
| 12       | France    | 12 |
| 13       | France    | 11 |
| 14       | France    | 11 |
| 15       | Korea     | 12 |
| 16       | Korea     | 8  |
| 17       | Korea     | 9  |

## COREQ (CONsolidated criteria for REporting Qualitative research) Checklist

A checklist of items that should be included in reports of qualitative research. You must report the page number in your manuscript where you consider each of the items listed in this checklist. If you have not included this information, either revise your manuscript accordingly before submitting or note N/A.

| Topic                                          | Item No. | Guide Questions/Description                                                                                                                              | Reported on Page No. |
|------------------------------------------------|----------|----------------------------------------------------------------------------------------------------------------------------------------------------------|----------------------|
| <b>Domain 1: Research team and reflexivity</b> |          |                                                                                                                                                          |                      |
| <i>Personal characteristics</i>                |          |                                                                                                                                                          |                      |
| Interviewer/facilitator                        | 1        | Which author/s conducted the interview or focus group?                                                                                                   |                      |
| Credentials                                    | 2        | What were the researcher's credentials? E.g. PhD, MD                                                                                                     |                      |
| Occupation                                     | 3        | What was their occupation at the time of the study?                                                                                                      |                      |
| Gender                                         | 4        | Was the researcher male or female?                                                                                                                       |                      |
| Experience and training                        | 5        | What experience or training did the researcher have?                                                                                                     |                      |
| <i>Relationship with participants</i>          |          |                                                                                                                                                          |                      |
| Relationship established                       | 6        | Was a relationship established prior to study commencement?                                                                                              |                      |
| Participant knowledge of the interviewer       | 7        | What did the participants know about the researcher? e.g. personal goals, reasons for doing the research                                                 |                      |
| Interviewer characteristics                    | 8        | What characteristics were reported about the interviewer/facilitator? e.g. Bias, assumptions, reasons and interests in the research topic                |                      |
| <b>Domain 2: Study design</b>                  |          |                                                                                                                                                          |                      |
| <i>Theoretical framework</i>                   |          |                                                                                                                                                          |                      |
| Methodological orientation and Theory          | 9        | What methodological orientation was stated to underpin the study? e.g. grounded theory, discourse analysis, ethnography, phenomenology, content analysis |                      |
| <i>Participant selection</i>                   |          |                                                                                                                                                          |                      |
| Sampling                                       | 10       | How were participants selected? e.g. purposive, convenience, consecutive, snowball                                                                       |                      |
| Method of approach                             | 11       | How were participants approached? e.g. face-to-face, telephone, mail, email                                                                              |                      |
| Sample size                                    | 12       | How many participants were in the study?                                                                                                                 |                      |
| Non-participation                              | 13       | How many people refused to participate or dropped out? Reasons?                                                                                          |                      |
| <i>Setting</i>                                 |          |                                                                                                                                                          |                      |
| Setting of data collection                     | 14       | Where was the data collected? e.g. home, clinic, workplace                                                                                               |                      |
| Presence of non-participants                   | 15       | Was anyone else present besides the participants and researchers?                                                                                        |                      |
| Description of sample                          | 16       | What are the important characteristics of the sample? e.g. demographic data, date                                                                        |                      |
| <i>Data collection</i>                         |          |                                                                                                                                                          |                      |
| Interview guide                                | 17       | Were questions, prompts, guides provided by the authors? Was it pilot tested?                                                                            |                      |
| Repeat interviews                              | 18       | Were repeat interviews carried out? If yes, how many?                                                                                                    |                      |
| Audio/visual recording                         | 19       | Did the research use audio or visual recording to collect the data?                                                                                      |                      |
| Field notes                                    | 20       | Were field notes made during and/or after the interview or focus group?                                                                                  |                      |
| Duration                                       | 21       | What was the duration of the interviews or focus group?                                                                                                  |                      |
| Data saturation                                | 22       | Was data saturation discussed?                                                                                                                           |                      |
| Transcripts returned                           | 23       | Were transcripts returned to participants for comment and/or                                                                                             |                      |



| Topic                                  | Item No. | Guide Questions/Description                                                                                                        | Reported on Page No. |
|----------------------------------------|----------|------------------------------------------------------------------------------------------------------------------------------------|----------------------|
|                                        |          | correction?                                                                                                                        |                      |
| <b>Domain 3: analysis and findings</b> |          |                                                                                                                                    |                      |
| <i>Data analysis</i>                   |          |                                                                                                                                    |                      |
| Number of data coders                  | 24       | How many data coders coded the data?                                                                                               |                      |
| Description of the coding tree         | 25       | Did authors provide a description of the coding tree?                                                                              |                      |
| Derivation of themes                   | 26       | Were themes identified in advance or derived from the data?                                                                        |                      |
| Software                               | 27       | What software, if applicable, was used to manage the data?                                                                         |                      |
| Participant checking                   | 28       | Did participants provide feedback on the findings?                                                                                 |                      |
| <i>Reporting</i>                       |          |                                                                                                                                    |                      |
| Quotations presented                   | 29       | Were participant quotations presented to illustrate the themes/findings?<br>Was each quotation identified? e.g. participant number |                      |
| Data and findings consistent           | 30       | Was there consistency between the data presented and the findings?                                                                 |                      |
| Clarity of major themes                | 31       | Were major themes clearly presented in the findings?                                                                               |                      |
| Clarity of minor themes                | 32       | Is there a description of diverse cases or discussion of minor themes?                                                             |                      |

Developed from: Tong A, Sainsbury P, Craig J. Consolidated criteria for reporting qualitative research (COREQ): a 32-item checklist for interviews and focus groups. *International Journal for Quality in Health Care*. 2007. Volume 19, Number 6: pp. 349 – 357

**Once you have completed this checklist, please save a copy and upload it as part of your submission. DO NOT include this checklist as part of the main manuscript document. It must be uploaded as a separate file.**
