# Supplementary material for: ‘A sword of Damocles’: patient and caregiver beliefs, attitudes and perspectives on presymptomatic testing for autosomal dominant polycystic kidney disease: a focus group study
Source: PubMed Central journal article supplement — BMJ Open. 2020 Oct 10;10(10):e038005. doi: 10.1136/bmjopen-2020-038005 (PMC7549480; doi:10.1136/bmjopen-2020-038005), 2020-10-10
Supplement: bmjopen-2020-038005supp001.pdf [file bmjopen-2020-038005supp001.pdf]

### Supplementary Material and Methods

#### Supplementary Table 1. Question guide

- What are your experiences (or thoughts) of genetic counselling/screening for ADPKD - in people who don't have symptoms but are at risk (i.e. because it is known to occur in the family)?
- What advantages (kidney donation, family planning)/disadvantages (anxiety, financial/insurance, uncertainty of the future) do you think are important when/if you make decisions about genetic screening - why?
- What about for children/family members? Do you think prenatal counselling would be useful/helpful?
- What are some of the emotional, ethical/moral issues around genetic testing for ADPKD?

#### Supplementary Table 2. Attendance in focus groups

| Group ID | Country   | N  |
|----------|-----------|----|
| 1        | Australia | 9  |
| 2        | Australia | 10 |
| 3        | Australia | 6  |
| 4        | Australia | 9  |
| 5        | Australia | 10 |
| 6        | Australia | 6  |
| 7        | Australia | 8  |
| 8        | Australia | 7  |
| 9        | Australia | 7  |
| 10       | Australia | 13 |
| 11       | France    | 6  |
| 12       | France    | 12 |
| 13       | France    | 11 |
| 14       | France    | 11 |
| 15       | Korea     | 12 |
| 16       | Korea     | 8  |
| 17       | Korea     | 9  |
